# Supplementary material for: Latitude affects Morningness-Eveningness: evidence for the environment hypothesis based on a systematic review
Source: PubMed Central journal article supplement (PMC5206670; doi:10.1038/srep39976), 2017-01-03
Supplement: srep39976-s1.pdf [file srep39976-s1.pdf]

## SUPPLEMENTARY INFORMATION

### Latitude affects Morningness-Eveningness: evidence for the environment hypothesis based on a systematic review

Christoph Randler & Arash Rahafar

#### Supplement 1: Studies used for the analysis in alphabetical order and comments. The numbering of the studies follows the numbering in the data sheet (S3).

1. Adan, A., Natale, V., Caci, H., & Prat, G. (2010). Relationship between circadian typology and functional and dysfunctional impulsivity. *Chronobiology International*, 27, 606-619. --- Data retrieved from the authors.
2. Ahn, Y. M., Chang, J., Joo, Y. H., Kim, S. C., Lee, K. Y., & Kim, Y. S. (2008). Chronotype distribution in bipolar I disorder and schizophrenia in a Korean sample. *Bipolar Disorders*, 10(2), 271-275.
3. Arbabi, Tayebbeh (2009). Personal data collection.
4. Bae, M., Lee, K., Baek, J. H., Kim, J. S., Cho, Y., Ryu, S., ... & Hong, K. S. (2014). Lifetime experiences of hypomanic symptoms are associated with delayed and irregular sleep-wake cycle and seasonality in non-clinical adult samples. *Comprehensive psychiatry*, 55(5), 1111-1115.
5. Bhatia, T., Agrawal, A., Beniwal, R. P., Thomas, P., Monk, T. H., Nimgaonkar, V. L., & Deshpande, S. N. (2013). A Hindi version of the Composite Scale of Morningness. *Asian Journal of Psychiatry*, 6(6), 581-584. --- used as three different studies/datasets because of three different samples given in the paper.
6. Blagrove, M., & Akehurst, L. (2000). Personality and dream recall frequency: Further negative findings. *Dreaming*, 10(3), 139.
7. Bohle, P., Tilley, A. J., & Brown, S. (2001). Psychometric evaluation of the Early/Late Preferences Scale. *Ergonomics*, 44, 887-900.
8. Boudebesse, C., Lajnef, M., Geoffroy, P. A., Bellivier, F., Nieto, I., Gard, S., ... & Etain, B. (2013). Chronotypes of bipolar patients in remission: Validation of the French version of the circadian type inventory in the FACE-BD sample. *Chronobiology International*, 30(8), 1042-1049.
9. Brown, F. M. (1993). Psychometric equivalence of an improved Basic Language Morningness (BALM) scale using industrial population within comparisons. *Ergonomics*, 36, 191-197.
10. Caci, H., Nadalet, L., Staccini, P., Myquel, M. & Boyer, P. (1999). Psychometric properties of the French version of the Composite Scale of Morningness. *European Psychiatry*, 14, 284-290.
11. Caci, H., Nadalet, L., Staccini, P., Myquel, M. & Boyer, P. (2000). The Composite Scale of Morningness: further psychometric properties and temporal stability. *European Psychiatry*, 15, 278-281.
12. Caci, H., Adan, A., Bohle, P., Natale, V., Pornpitakpan, C., & Tilley, A. (2005). Transcultural properties of the composite scale of morningness: the relevance of the "morning affect" factor. *Chronobiology International*, 22, 523-540.
13. Caci, H., Deschaux, O., Adan, A., & Natale, V. (2009). Comparing three morningness scales: Age and gender effects, structure and cut-off criteria. *Sleep Medicine*, 10, 240-245.
14. Di Milia L, Mueller H. (2012). Does impression management impact the relationship between morningness-eveningness and self-rated sleepiness? *Personality and Individual Differences*, 52, 702-706.

15. Díaz-Morales, J. F., & Sánchez-López, M. (2005). Composite scales of morningness and preferences: preliminary validity data in Peruvian undergraduates. *Ergonomics*, *48*, 354-363.
16. Díaz-Morales, J.F., & Sánchez-López, M.P. (2004). Composite and preferences scales of morningness: reliability and factor invariance in adult and university samples. *The Spanish Journal of Psychology*, *7*(2), 93-100.
17. Díaz-Morales, J.F. (2007). Morning and evening-types: exploring their personality styles. *Personality and Individual Differences*, *43*, 769-778.
18. Díaz-Morales, J. F., & Sánchez-López, P. M<sup>a</sup>. (2008). Morningness-Eveningness and Anxiety among Adults: A Matter of Sex/Gender? *Personality and Individual Differences*, *44*, 1391-1401.
19. Díaz-Morales, J. F., & Aparicio, M. (2003). Relaciones entre estilos de personalidad y tipología circadiana. *Anales de Psicología*, *19*(2), 247-256.
20. Diaz-Ramirez (2000) unpublished PhD thesis, cited in Díaz Morales, J. F. & Sánchez-López M. P.(2005) Propiedades psicométricas de la Escala de Preferencias y la Escala Compuesta de Matutinidad. *Psicothema* *17*, 471-477.
21. Digdon, N. L. (2010) Circadian preference and college students' beliefs about sleep education. *Chronobiology International*, *27*, 297-317.
22. Digdon, N., & Landry, K. (2013). University students' motives for drinking alcohol are related to evening preference, poor sleep, and ways of coping with stress. *Biological Rhythm Research*, *44*(1), 1-11.
23. Dresch, V., Sánchez López, M. D. P., & Aparicio García, M. E. (2005). Diferencias de personalidad entre matutinos y vespertinos. *Revista Latinoamericana de Psicología*, *37*(3), 509-522.
24. Driscoll, H. C., Serody, L., Patrick, S., Maurer, J., Bensasi, S., Houck, P. R., ... & Reynolds, C. F. (2008). Sleeping well, aging well: a descriptive and cross-sectional study of sleep in "successful agers" 75 and older. *The American Journal of Geriatric Psychiatry*, *16*(1), 74-82.
25. Gil, E., Abdo, P. L., Rodriguez, M., Zanin, L., & De Bortoli, M. (2008). Psychometric and comparative study of an argentine version of the morningness composite and the early/late preference scales. *Chronobiology International*, *25*(1), 133-143.
26. Goel, N., Banks, S., Lin, L., Mignot, E., & Dinges, D. F. (2011). Catechol-O-methyltransferase Val158Met polymorphism associates with individual differences in sleep physiologic responses to chronic sleep loss. *PLoS One*, *6*(12), 27.
27. Gomes, A. A., Tavares, J., Azevedo, M.H.P de. (2011). Sleep an academic performance in undergraduates: A multi-measure, multi-predictor approach. *Chronobiology International*, *28*, 786-801.
28. Greenwood, K. M. (1994). Long-term stability and psychometric properties of the Composite Scale of Morningness. *Ergonomics*, *37*, 377-383.
29. Haraszti, R. Á., Purebl, G., Salavecz, G., Poole, L., Dockray, S., & Steptoe, A. (2014). Morningness-eveningness interferes with perceived health, physical activity, diet and stress levels in working women: A cross-sectional study. *Chronobiology International*, *31*(7), 829-837.
30. Horzum, M. B., Önder, İ., & Beşoluk, Ş. (2014). Chronotype and academic achievement among online learning students. *Learning and Individual Differences*, *30*, 106-111.
31. Ianni, P. A., & Lafreniere, K. D. (2014). Personality and motivational correlates of energy drink consumption and misuse among female undergraduate students. *Personality and Individual Differences*, *69*, 110-114.
32. Jankowski, K. S., Vollmer, C., Linke, M., & Randler, C. (2014). Differences in sun time within the same time zone affect sleep-wake and social rhythms, but not morningness preference: Findings from a Polish-German comparison study. *Time & Society*, *23*, 258-276.

33. Jeong, S. H., Yu, J. C., Lee, C. H., Choi, K. S., Choi, J. E., Kim, S. H., & Joo, E. J. (2014). Human CLOCK gene-associated attention deficit hyperactivity disorder-related features in healthy adults: quantitative association study using Wender Utah Rating Scale. *European Archives of Psychiatry and Clinical Neuroscience*, 264(1), 71-81.
34. Kasof, J. (2001). Eveningness and bulimic behavior. *Personality and Individual Differences*, 31, 361-369.
35. Klei, L., Reitz, P., Miller, M., Wood, J., Maendel, S., Gross, D., Waldner, T., Eaton, J., Monk, T. H., Nimgaonkar, V. L. (1998). Heritability of morningness-eveningness and self-report sleep measures in a family based sample of 521 Hutterites. *Chronobiology International*, 22, 1041-1054.
36. Kolomeichuk, S., Randler, C., Churov, A., & Borisenkov, M. (2015). Psychometric properties of the Russian version of the Composite Scale of Morningness. *Biological Rhythm Research*, 46 (5), 725-737 --- only data from adults used.
37. Lau, E. Y. Y., Wong, M. L., Ng, E. C. W., Hui, C. C. H., Cheung, S. F., & Mok, D. S. Y. (2013). "Social Jetlag" in Morning-Type College Students Living On Campus: Implications for Physical and Psychological Well-being. *Chronobiology International*, 30(7), 910-918.
38. Lee, J. H., Kim, S. J., Lee, S. Y., Jang, K. H., Kim, I. S., & Duffy, J. F. (2014). Reliability and validity of the Korean version of Morningness–Eveningness Questionnaire in adults aged 20–39 years. *Chronobiology International*, 31(4), 479-486.
39. Mansour, H. A., Wood, J., Chowdari, K. V., Dayal, M., Thase, M. E., Kupfer, D. J., ... & Nimgaonkar, V. L. (2005). Circadian phase variation in bipolar I disorder. *Chronobiology International*, 22(3), 571-584.
40. Miller, M. A., Rothenberger, S. D., Hasler, B. P., Donofry, S. D., Wong, P. M., Manuck, S. B., ... & Roeklein, K. A. (2015). Chronotype predicts positive affect rhythms measured by ecological momentary assessment. *Chronobiology International*, 32(3), 376-384.
41. Monk, T. H., Buysse, D. J., Billy, B. D., Fletcher, M. E., Kennedy, K. S., Schlarb, J. E., & Beach, S. R. (2011). Circadian type and bed-timing regularity in 654 retired seniors: correlations with subjective sleep measures. *Sleep*, 34(2), 235.
42. Morera-Fumero, A. L., Abreu-Gonzalez, P., Henry-Benítez, M., Díaz-Mesa, E., Yelmo-Cruz, S., & Gracia-Marco, R. (2013). Chronotype as modulator of morning serum melatonin levels. *Actas Esp Psiquiatr*, 41(3), 149-53.
43. Natale, V., & Di Milia, L. (2011). Season of birth and morningness: comparison between the northern and southern hemispheres. *Chronobiology International*, 28, 727–730.
44. Ojeda, D. A., Perea, C. S., Niño, C. L., Gutiérrez, R. M., López-León, S., Arboleda, H., ... & Forero, D. A. (2013). A novel association of two non-synonymous polymorphisms in PER2 and PER3 genes with specific diurnal preference subscales. *Neuroscience Letters*, 553, 52-56.
45. Önder, İ., Beşoluk, Ş., & Horzum, M. B. (2013). Psychometric properties of the Turkish version of the composite scale of morningness. *The Spanish Journal of Psychology*, 16, E67.
46. Park, C. I., An, S. K., Kim, H. W., Koh, M. J., Namkoong, K., Kang, J. I., & Kim, S. J. (2015). Relationships between chronotypes and affective temperaments in healthy young adults. *Journal of Affective Disorders*, 175, 256-259.
47. Pica, G., Amato, C., Pierro, A., & Kruglanski, A. W. (2015). The early bird gets the worm: On locomotors' preference for morningness. *Personality and Individual Differences*, 76, 158-160.
48. Pornpitakpan, C. (1998). Psychometric properties of the composite scale of morningness: a shortened version. *Personality and Individual Differences*, 25, 699-709.
49. Pornpitakpan, C. (2000). Additional validity of the Basic Language Morningness (BALM) Scale. *Personality and Individual Differences*, 28, 59-72.

50. Prat, G., & Adan, A. (2013). Relationships among circadian typology, psychological symptoms, and sensation seeking. *Chronobiology International*, 30(7), 942-949.
51. Randler, C. (2015). Germany, unpublished data.
52. Randler, C., Horzum, M. B., & Vollmer, C. (2014). Internet addiction and its relationship to chronotype and personality in a Turkish university student sample. *Social Science Computer Review*, 32, 484-495.
53. Randler, C., Prokop, P., Sahu, S., & Haldar, P. (2015). Cross-cultural comparison of seven morningness and sleep-wake measures from Germany, India and Slovakia. *International Journal of Psychology*, 50, 279-287.
54. Roeklein, K. A., Wong, P. M., Franzen, P. L., Hasler, B. P., Wood-Vasey, W. M., Nimgaonkar, V. L., ... & Manuck, S. B. (2012). Melanopsin gene variations interact with season to predict sleep onset and chronotype. *Chronobiology international*, 29(8), 1036-1047.
55. Roeser, K., Riepl, K., Randler, C., & Kübler, A. (2015). Effects of Chronotype and Synchrony/Asynchrony on Creativity. *Journal of Individual Differences*, 36, 131-137.
56. Sánchez López, M. P., & Díaz Morales, J. F. (2001). Tipología circadiana y estilos de personalidad en mujeres universitarias argentinas. *Psicodebate*, 97-117.
57. Savis, J. C., Eliot, J. F., Gansneder, B., & Rotella, R. J. (1997). A subjective means of assessing college athletes's sleep: A modification of the morningness/eveningness questionnaire. *International Journal of Sports Psychology*, 28, 157-171.
58. Seleem, M. A., Merranko, J. A., Goldstein, T. R., Goldstein, B. I., Axelson, D. A., Brent, D. A., ... & Birmaher, B. (2015). The longitudinal course of sleep timing and circadian preferences in adults with bipolar disorder. *Bipolar disorders*. In press.
59. Smith, C. S., Folkard, S., Schmieler, R. A., Parra, L. F., Spelten, E., Almira, H., Sen, R. N., Sahu, S., Perez, L. M., & Tisak, J. (2002). Investigation of morning-evening orientation in six countries using the preferences scale. *Personality and Individual Differences*, 32, 949-968.
60. Soehner, A. M., Kennedy, K. S., & Monk, T. H. (2007). Personality correlates with sleep-wake variables. *Chronobiology International*, 24, 889-903.
61. Soehner, A. M., Kennedy, K. S., & Monk, T. H. (2011). Circadian preference and sleep-wake regularity: associations with self-report parameters in daytime working adults. *Chronobiology International*, 28, 802-809.
62. Stolarski, M., & Jankowski, K. S. (2015). Morningness-eveningness and performance-based emotional intelligence. *Biological Rhythm Research*, 46(3), 417-423.
63. Thun, E., Bjorvatn, B., Osland, T., Steen, V. M., Sivertsen, B., Johansen, T., Lilleholt, T. H., Udnes, I., Nordhus, I. H., & Pallesen, S. (2012). An actigraphy validation study of seven morningness-eveningness inventories. *European Psychologist*, 17, 222-230.
64. Voinescu, B. I., Coogan, A. N., Thome, J., & Orasan, R. (2010). Psychometric properties of the romanian version of the composite scale of morningness in healthy adults. *Cognitie, Creier, Comportament*, 14(1), 37-46.
65. Voinescu, B., Vesa, J., & Coogan, A. (2011). Self-reported diurnal preference and sleep disturbance in type 2 diabetes mellitus. *Acta Endocrinologica-Bucharest*, 7(1), 69-82.
66. Voinescu, B. I., & Szentagotai, A. (2015). Sleep hygiene awareness: its relation to sleep quality and diurnal preference. *Journal of Molecular Psychiatry*, 3, 1.
67. Waage, S., Moen, B. E., Pallesen, S., Eriksen, H. R., & Ursin, H. (2009). Shift work disorder among oil rig workers in the North Sea. *Sleep*, 32(4), 558. --- day shift used

68. Wood, J., Birmaher, B., Axelson, D., Ehmann, M., Kalas, C., Monk, K., ... & Nimgainkar, V. L. (2009). Replicable differences in preferred circadian phase between bipolar disorder patients and control individuals. *Psychiatry Research*, 166(2), 201-209.
69. Zickar, M. J., Russell, S. S., Smith, C. S., Bohle, P., & Tilley, A. J. (2002). Evaluating two morningness scales with item response theory. *Personality and Individual Differences*, 33(1), 11-24.

**Supplement 2: Database used for the study. Comments column: information is given, when subsamples have been used (e.g. healthy controls) or when data on temperature/climate have been collected from a climate station nearby. Data on temperature and photoperiod have been taken from different sources and places, when a nearby place was used, the information is given. Please note that the supplemental data are also uploaded by SPSS file (sav) and Excel.**

| No | author                       | year | country    | location        | comment                                     | mean_age | age_SD | total_sample | CSM_mean | SD_CSM | percent_female | Latitude_mirror | mean_temp | source_temp        | sunrise  | photoperiod_hh_min | sunset   | comment_sunrise |
|----|------------------------------|------|------------|-----------------|---------------------------------------------|----------|--------|--------------|----------|--------|----------------|-----------------|-----------|--------------------|----------|--------------------|----------|-----------------|
| 1  | Adan et al.                  | 2010 | Spain      | Barcelona       |                                             | 21,98    | 2,86   | 850          | 30,74    | 7,29   | 53,41          | 41,00           | 15,50     | klimadiagram.me.de | 06:18:00 | 15:10              | 21:28:00 |                 |
| 2  | Ahn et al.                   | 2008 | SouthKorea | Seoul           | only control group used                     | 33,70    | 7,90   | 95           | 32,60    | 5,70   | 48,42          | 37,00           | 11,80     | klimadiagram.me.de | 05:11:00 | 14:45              | 19:56:00 |                 |
| 3  | Arbabi, Tayebe               | 2009 | Iran       | Mashhad         |                                             | 21,21    | 1,05   | 499          | 32,72    | 6,79   | 48,50          | 36,00           | 13,60     | klimadiagram.me.de | 05:14:00 | 14:38              | 19:52:00 |                 |
| 4  | Bae                          | 2014 | SouthKorea | Seoul           |                                             | 33,50    | 9,20   | 313          | 35,25    | 6,80   | 61,02          | 37,00           | 11,80     | klimadiagram.me.de | 05:11:00 | 14:45              | 19:56:00 |                 |
| 5  | Bhatia                       | 2015 | India      | Delhi           |                                             | 21,05    | 1,67   | 83           | 43,12    | 4,13   | 100,00         | 28,00           | 25,00     | klimadiagram.me.de | 05:24:00 | 13:58              | 19:22:00 |                 |
| 5  | Bhatia                       | 2015 | India      | Delhi           |                                             | 41,50    | 11,93  | 160          | 43,43    | 5,17   | 74,38          | 28,00           | 25,00     | klimadiagram.me.de | 05:24:00 | 13:58              | 19:22:00 |                 |
| 5  | Bhatia                       | 2015 | India      | Delhi           |                                             | 30,97    | 14,60  | 150          | 42,94    | 5,78   | 32,67          | 28,00           | 25,00     | klimadiagram.me.de | 05:24:00 | 13:58              | 19:22:00 |                 |
| 6  | Blagrove & Akehurst          | 2000 | UK         | Wales           |                                             | 21,30    | 3,50   | 93           | 34,69    | 6,76   | 49,46          | 51,00           | 11,00     | weatherbase.com    | 04:58:00 | 16:39              | 21:37:00 | Wales           |
| 7  | Bohle et al.                 | 2001 | Australia  | Brisbane/Sydney |                                             | 22,50    |        | 670          | 32,90    | 7,50   | 64,26          | 30,00           | 20,60     | klimadiagram.me.de | 04:50:00 | 13:52              | 18:42:00 | Brisbane        |
| 8  | Boudebese et al.             | 2013 | France     | Créteil         | healthy control; PARIS used for temperature | 42,04    | 11,50  | 156          | 39,64    | 7,90   | 53,85          | 48,00           | 10,60     | klimadiagram.me.de | 05:47:00 | 16:10              | 21:57:00 | Paris           |
| 9  | Brown                        | 1993 | USA        | Pennsylvania    | HARRISBURG used for temperature             | 39,54    | 9,84   | 148          | 41,04    |        | 20,27          | 41,00           | 11,80     | weatherbase.com    | 05:38:00 | 15:02              | 20:40:00 | Harrisburg      |
| 10 | Caci et al.                  | 1999 | France     | Nice            |                                             | 25,60    | 6,10   | 356          | 37,31    | 6,36   | 85,11          | 43,00           | 15,30     | klimadiagram.me.de | 05:49:00 | 15:26              | 21:15:00 |                 |
| 11 | Caci et al.                  | 2000 | France     | Nice            |                                             | 22,51    | 4,37   | 60           | 38,33    | 6,91   | 81,67          | 43,00           | 15,30     | klimadiagram.me.de | 05:49:00 | 15:26              | 21:15:00 |                 |
| 12 | Caci et al.                  | 2005 | Thai       | Bangkok         |                                             | 17,64    | 1,25   | 503          | 34,34    | 5,59   | 74,55          | 14,00           | 28,40     | klimadiagram.me.de | 05:52:00 | 12:56              | 18:48:00 |                 |
| 12 | Caci et al.                  | 2005 | Italy      | Bologna         |                                             | 23,01    | 3,94   | 702          | 32,73    | 6,25   | 60,26          | 44,00           | 13,21     | klimadiagram.me.de | 05:30:00 | 15:33              | 21:03:00 |                 |
| 12 | Caci et al.                  | 2005 | France     | Nice            |                                             | 24,29    | 5,40   | 627          | 36,80    | 6,43   | 67,62          | 43,00           | 15,30     | klimadiagram.me.de | 05:49:00 | 15:26              | 21:15:00 |                 |
| 12 | Caci et al.                  | 2005 | France     | Nice            |                                             | 23,00    | 5,24   | 552          | 36,57    | 6,55   | 64,86          | 43,00           | 15,30     | klimadiagram.me.de | 05:49:00 | 15:26              | 21:15:00 |                 |
| 12 | Caci et al.                  | 2005 | Australia  | Sydney          |                                             | 22,45    | 6,89   | 654          | 33,10    | 7,53   | 63,61          | 33,00           | 17,90     | klimadiagram.me.de | 05:41:00 | 14:24              | 20:05:00 |                 |
| 12 | Caci et al.                  | 2005 | Spain      | Barcelona       |                                             | 19,94    | 2,22   | 391          | 30,74    | 6,54   | 66,24          | 41,00           | 15,50     | klimadiagram.me.de | 06:18:00 | 15:10              | 21:28:00 |                 |
| 13 | Caci et al.                  | 2009 | France     | Nice            |                                             | 23,00    | 4,48   | 442          | 33,35    | 6,77   | 64,48          | 43,00           | 15,30     | klimadiagram.me.de | 05:49:00 | 15:26              | 21:15:00 |                 |
| 14 | Di Milia & Mueller           | 2012 | Australia  | Rockhampton     |                                             | 36,28    | 12,94  | 184          | 39,93    | 8,80   | 44,57          | 23,00           | 22,44     | climate-charts.com | 05:09:00 | 13:34              | 18:43:00 |                 |
| 15 | Diaz-Morales & Sanchez-Lopez | 2005 | Peru       | Lima            |                                             | 21,73    | 2,63   | 139          | 33,88    | 6,24   | 78,40          | 12,00           | 19,20     | klimadiagram.me.de | 05:41:00 | 12:50              | 18:31:00 |                 |

|        |                              |          |                    |                    |                                                                         |       |           |       |       |      |        |       |       |                             |              |       |              |                   |
|--------|------------------------------|----------|--------------------|--------------------|-------------------------------------------------------------------------|-------|-----------|-------|-------|------|--------|-------|-------|-----------------------------|--------------|-------|--------------|-------------------|
| 1<br>6 | Diaz-Morales & Sanchez-Lopez | 20<br>04 | Spain              | Madrid             |                                                                         | 21,27 | 1,60      | 203   | 28,90 | 6,14 | 81,80  | 40,00 | 15,30 | klimadiagram<br>me.de       | 06:45<br>:00 | 15:03 | 21:48<br>:00 |                   |
| 1<br>6 | Diaz-Morales & Sanchez-Lopez | 20<br>04 | Spain              | Madrid             |                                                                         | 49,10 | 6,31      | 125   | 35,57 | 5,55 | 66,70  | 40,00 | 14,40 | klimadiagram<br>me.de       | 06:45<br>:00 | 15:03 | 21:48<br>:00 |                   |
| 1<br>7 | Diaz-Morales                 | 20<br>07 | Spain              | Madrid             | PAID, personality<br>styles                                             | 21,53 | 2,77      | 360   | 30,55 | 6,93 | 76,39  | 40,00 | 15,30 | klimadiagram<br>me.de       | 06:45<br>:00 | 15:03 | 21:48<br>:00 |                   |
| 1<br>8 | Diaz-Morales & Sanchez-Lopez | 20<br>08 | Spain              | Madrid             | PAID sex/gender                                                         | 50,06 | 6,40      | 559   | 38,20 | 6,95 | 41,68  | 40,00 | 15,30 | klimadiagram<br>me.de       | 06:45<br>:00 | 15:03 | 21:48<br>:00 |                   |
| 1<br>9 | Diaz-Morales & Aparicio      | 20<br>03 | Spain              | Madrid             |                                                                         | 29,05 | 12,5<br>6 | 189   | 31,88 | 7,37 | 67,72  | 40,00 | 15,30 | klimadiagram<br>me.de       | 06:45<br>:00 | 15:03 | 21:48<br>:00 |                   |
| 2<br>0 | Diaz Ramiro                  | 20<br>00 | Spain              | Madrid             | cited in<br>Diaz.Morales<br>Psicothema 2005                             | 20,34 |           | 314   | 31,07 | 6,40 | 81,00  | 40,00 | 15,30 | klimadiagram<br>me.de       | 06:45<br>:00 | 15:03 | 21:48<br>:00 |                   |
| 2<br>1 | Digdon                       | 20<br>10 | Canada             | Edmonton           |                                                                         | 21,21 | 5,50      | 461   | 31,99 | 7,09 | 71,14  | 53,00 | 3,50  | klimadiagram<br>me.de       | 05:05<br>:00 | 17:02 | 22:07<br>:00 |                   |
| 2<br>2 | Digdon & Landry              | 20<br>13 | Canada             | Edmonton           |                                                                         | 21,80 | 6,80      | 219   | 31,86 | 6,47 | 71,69  | 53,00 | 3,50  | klimadiagram<br>me.de       | 05:05<br>:00 | 17:02 | 22:07<br>:00 |                   |
| 2<br>3 | Dresch et al.                | 20<br>05 | Brasil             | Novo<br>Hamburgo   | Porto Alegre used<br>for temperature                                    | 24,20 | 7,20      | 804   | 35,26 | 7,32 | 62,06  | 29,00 | 19,50 | klimadiagram<br>me.de       | 06:21<br>:00 | 14:05 | 20:26<br>:00 | Porto<br>Alegre   |
| 2<br>4 | Driscoll et al.              | 20<br>08 | USA                | Pittsburgh         |                                                                         | 78,90 | 3,30      | 64    | 44,90 | 5,40 | 46,90  | 40,00 | 10,20 | klimadiagram<br>me.de       | 05:50<br>:00 | 15:03 | 20:53<br>:00 |                   |
| 2<br>5 | Gil et al.                   | 20<br>08 | Argentina          | La Pampa           | San Luis, Mendoza,<br>General Pico // La<br>Pampa used for<br>geography | 33,64 | 14,0<br>0 | 304   | 36,41 | 7,65 | 69,10  | 37,00 | 16,70 | klimadiagram<br>me.de       | 06:24<br>:00 | 14:19 | 20:43<br>:00 | Mendoza           |
| 2<br>6 | Goel et al.                  | 20<br>11 | USA                | Pennsylvani<br>a   | Penn State college                                                      | 29,97 |           | 129   | 39,88 |      | 48,84  | 41,00 | 9,00  | weatherbase.<br>com         | 05:32<br>:00 | 15:00 | 20:32<br>:00 | Pennsylvani<br>a  |
| 2<br>7 | Gomes et al.                 | 20<br>11 | Portugal           | Coimbra/Av<br>eiro |                                                                         | 19,98 | 1,65      | 1.654 | 32,20 | 5,76 | 55,00  | 40,00 | 15,00 | weatherbase.<br>com         | 06:01<br>:00 | 15:09 | 21:10<br>:00 |                   |
| 2<br>8 | Greenwood                    | 19<br>94 | Australia          | La Trobe           |                                                                         | 21,30 |           | 424   | 36,10 | 6,70 | 88,10  | 38,00 | 14,60 | klimadiagram<br>me.de       | 05:55<br>:00 | 14:47 | 20:42<br>:00 | Melbourne         |
| 2<br>9 | Haraszti et al.              | 20<br>14 | Hungary            | Budapest           |                                                                         | 37,56 | 10,6<br>8 | 202   | 37,19 | 7,59 | 100,00 | 47,00 | 10,40 | klimadiagram<br>me.de       | 04:47<br>:00 | 15:58 | 20:45<br>:00 |                   |
| 3<br>0 | Horzum et al.                | 20<br>14 | Turkey             | Ankara             |                                                                         | 25,63 | 6,63      | 724   | 35,40 | 6,10 | 49,86  | 39,00 | 11,71 | klimadiagram<br>me.de       | 05:20<br>:00 | 15:00 | 20:20<br>:00 |                   |
| 3<br>1 | Ianni & Lafreniere           | 20<br>14 | Canada             | Ontario            |                                                                         | 20,90 | 2,40      | 96    | 30,74 | 7,35 | 100,00 | 42,00 | 9,90  | weatherbase.<br>com         | 05:55<br>:00 | 15:16 | 21:11<br>:00 |                   |
| 3<br>2 | Jankowski et al.             | 20<br>14 | Poland             | Warsaw             |                                                                         | 20,81 | 1,73      | 291   | 32,37 | 6,72 | 82,82  | 52,00 | 7,80  | klimadiagram<br>me.de       | 04:14<br>:00 | 16:46 | 21:00<br>:00 |                   |
| 3<br>3 | Jeong et al.                 | 20<br>14 | SouthKorea         | Seoul              |                                                                         | 25,06 | 6,05      | 1.289 | 30,67 | 6,00 | 63,07  | 37,00 | 11,80 | klimadiagram<br>me.de       | 05:11<br>:00 | 14:45 | 19:56<br>:00 |                   |
| 3<br>4 | Kasof                        | 20<br>01 | USA                | California         |                                                                         | 22,70 | 4,90      | 151   | 38,60 | 6,11 | 62,25  | 34,00 | 17,20 | selbst<br>berechnet.co<br>m | 05:41<br>:00 | 14:23 | 20:04<br>:00 |                   |
| 3<br>5 | Klei et al.                  | 20<br>05 | Canada             | Manitoba           | WINNIPEG used<br>for temperature                                        | 37,30 |           | 521   | 41,00 | 5,80 | 65,26  | 50,00 | 2,40  | climatecharts.<br>com       | 05:20<br>:00 | 16:21 | 21:41<br>:00 | Winnipeg          |
| 3<br>6 | Kolomeichuck et al.          | 20<br>15 | Russia             | Petrozavods<br>k   | adults only                                                             | 21,74 | 2,96      | 298   | 31,58 | 6,33 | 64,43  | 61,78 | 3,20  | klimadiagram<br>me.de       | 03:35<br>:00 | 18:50 | 22:25<br>:00 | St.<br>Petersburg |
| 3<br>7 | Lau et al.                   | 20<br>13 | China/Hon<br>gkong | HongKong           | Hongkong/Macau/<br>Hongkong<br>Observatory for<br>climate data          | 20,20 | 2,30      | 1.263 | 31,38 | 5,93 | 66,50  | 22,00 | 22,93 | klimadiagram<br>me.de       | 05:40<br>:00 | 13:30 | 19:10<br>:00 |                   |
| 3<br>8 | Lee et al.                   | 20<br>14 | SouthKorea         | Seoul              |                                                                         | 22,90 | 2,14      | 299   | 31,90 | 6,39 | 36,12  | 37,00 | 11,80 | klimadiagram<br>me.de       | 05:11<br>:00 | 14:45 | 19:56<br>:00 |                   |

|    |                              |      |            |                     |                                                                     |       |       |       |       |      |        |       |       |                    |          |       |          |            |
|----|------------------------------|------|------------|---------------------|---------------------------------------------------------------------|-------|-------|-------|-------|------|--------|-------|-------|--------------------|----------|-------|----------|------------|
| 39 | Mansour et al.               | 2005 | USA        | Pittsburgh          | only control group used                                             | 33,00 | 10,10 | 349   | 37,30 | 7,80 | 52,15  | 40,00 | 10,20 | klimadiagram.me.de | 05:50:00 | 15:03 | 20:53:00 |            |
| 40 | Miller et al.                | 2015 | USA        | Pittsburgh          |                                                                     | 42,89 | 7,33  | 408   | 39,52 | 7,13 | 51,70  | 40,00 | 10,20 | klimadiagram.me.de | 05:50:00 | 15:03 | 20:53:00 |            |
| 41 | Monk et al.                  | 2011 | USA        | Pittsburgh area     |                                                                     | 74,70 | 6,00  | 654   | 41,30 | 6,60 | 44,50  | 40,00 | 10,20 | klimadiagram.me.de | 05:50:00 | 15:03 | 20:53:00 |            |
| 42 | Morera-Fumero et al.         | 2013 | Tenerife   | La Laguna           | Santa Cruz de Tenerife used for temperature                         | 41,50 | 11,40 | 118   | 36,90 | 6,90 | 49,00  | 28,00 | 21,20 | klimadiagram.me.de | 07:08:00 | 13:57 | 21:05:00 | Santa Cruz |
| 43 | Natale & Di Milia            | 2011 | Italy      | Bologna             |                                                                     | 23,60 | 4,35  | 933   | 32,50 | 6,43 | 59,16  | 44,00 | 13,21 | klimadiagram.me.de | 05:30:00 | 15:33 | 21:03:00 |            |
| 43 | Natale & Di Milia            | 2011 | Australia  | Rockhampton         |                                                                     | 24,79 | 7,45  | 732   | 36,70 | 7,37 | 68,12  | 23,00 | 22,44 | climate-charts.com | 05:09:00 | 13:34 | 18:43:00 |            |
| 44 | Ojeda et al.                 | 2013 | Colombia   | Bogota              |                                                                     | 20,80 | 2,70  | 209   | 39,97 | 5,63 | 70,33  | 4,00  | 13,30 | klimadiagram.me.de | 05:47:00 | 12:23 | 18:10:00 |            |
| 45 | Önder et al.                 | 2013 | Turkey     | Sakarya             |                                                                     | 22,58 | 3,13  | 650   | 34,38 | 6,17 | 52,60  | 41,00 | 14,12 | klimadiagram.me.de | 05:32:00 | 15:07 | 20:39:00 | Istanbul   |
| 46 | Park et al.                  | 2015 | SouthKorea | Seoul               |                                                                     | 22,70 | 3,71  | 641   | 32,85 | 6,00 | 41,34  | 37,00 | 11,80 | klimadiagram.me.de | 05:11:00 | 14:45 | 19:56:00 |            |
| 47 | Pica et al.                  | 2015 | Italy      | Rome                |                                                                     | 24,69 | 5,08  | 342   | 32,19 | 5,94 | 67,54  | 41,00 | 15,40 | klimadiagram.me.de | 05:35:00 | 15:13 | 20:48:00 |            |
| 48 | Pornpitakpan                 | 1998 | Thai       | Bangkok             |                                                                     | 18,26 | 1,04  | 321   | 35,30 | 6,10 | 90,34  | 14,00 | 28,40 | klimadiagram.me.de | 05:52:00 | 12:56 | 18:48:00 |            |
| 49 | Pornpitakpan                 | 2000 | Singapore  | Singapore           |                                                                     | 20,68 | 1,15  | 100   | 32,37 | 5,84 | 79,00  | 1,00  | 27,30 | klimadiagram.me.de | 07:01:00 | 12:11 | 19:12:00 |            |
| 50 | Prat & Adan                  | 2013 | Spain      | Barcelona           |                                                                     | 21,40 | 2,90  | 517   | 30,32 | 7,13 | 66,54  | 41,00 | 15,50 | klimadiagram.me.de | 06:18:00 | 15:10 | 21:28:00 |            |
| 51 | Randler                      | 2015 | Germany    | SW Germany          | KARLSRUHE for temperature                                           | 18,99 | 0,83  | 1.812 | 32,89 | 6,30 | 71,30  | 49,00 | 10,30 | klimadiagram.me.de | 05:19:00 | 16:17 | 21:36:00 | Mannheim   |
| 51 | Randler                      | 2015 | Germany    | SW Germany          | KARLSRUHE for temperature                                           | 23,76 | 2,37  | 3.340 | 33,22 | 6,37 | 62,50  | 49,00 | 10,30 | klimadiagram.me.de | 05:19:00 | 16:17 | 21:36:00 | Mannheim   |
| 51 | Randler                      | 2015 | Germany    | SW Germany          | KARLSRUHE for temperature                                           | 57,98 | 6,13  | 356   | 39,30 | 6,31 | 74,70  | 49,00 | 10,30 | klimadiagram.me.de | 05:19:00 | 16:17 | 21:36:00 | Mannheim   |
| 51 | Randler                      | 2015 | Germany    | SW Germany          | KARLSRUHE for temperature                                           | 40,25 | 6,13  | 734   | 37,04 | 7,17 | 75,30  | 49,00 | 10,30 | klimadiagram.me.de | 05:19:00 | 16:17 | 21:36:00 | Mannheim   |
| 52 | Randler et al.               | 2014 | Turkey     | Sakarya             | ISTANBUL used for temperature                                       | 20,81 | 1,97  | 616   | 34,11 | 6,41 | 72,10  | 41,00 | 14,12 | klimadiagram.me.de | 05:32:00 | 15:07 | 20:39:00 | Istanbul   |
| 53 | Randler et al.               | 2015 | India      | Kalyani             | Calcutta used for temperature                                       | 20,02 | 1,23  | 409   | 37,10 | 6,32 | 53,79  | 23,00 | 26,90 | klimadiagram.me.de | 04:53:00 | 13:31 | 18:24:00 | Calcutta   |
| 53 | Randler et al.               | 2015 | Slovakia   | Trnava              | PIESTANY used for temperature                                       | 20,56 | 4,27  | 482   | 33,43 | 6,00 | 81,95  | 48,00 | 9,00  | weatherbase.com    | 04:51:00 | 16:04 | 20:55:00 | Bratislava |
| 54 | Roecklein et al.             | 2012 | USA        | Pittsburgh          |                                                                     | 41,90 | 7,70  | 233   | 39,35 | 7,13 | 46,60  | 40,00 | 10,20 | klimadiagram.me.de | 05:50:00 | 15:03 | 20:53:00 |            |
| 55 | Roeser et al.                | 2015 | Germany    | Würzburg            | GEISENHEIM used for temperature                                     | 22,82 | 5,83  | 153   | 32,95 | 5,67 | 83,40  | 50,00 | 9,40  | klimadiagram.me.de | 05:12:00 | 16:20 | 21:32:00 |            |
| 56 | Sanchez-Lopez & Diaz-Morales | 2001 | Argentina  | oeste del Argentina | cited in Diaz.Morales Psicothema 2005; CORDOBA used for temperature | 21,02 | 1,80  | 120   | 34,30 | 5,16 | 100,00 | 31,00 | 17,30 | klimadiagram.me.de | 06:09:00 | 14:11 | 20:20:00 | Cordoba    |
| 57 | Savis et al.                 | 1997 | USA        | Charlottesville VA  |                                                                     | 19,96 |       | 65    | 33,86 | 5,88 | 46,15  | 38,00 | 14,00 | weatherbase.com    | 05:52:00 | 14:48 | 20:40:00 |            |
| 58 | Seleem et al.                | 2015 | USA        | Pittsburgh          | healthy controls used                                               | 40,80 | 7,30  | 55    | 40,50 | 6,50 | 21,80  | 40,00 | 10,20 | klimadiagram.me.de | 05:50:00 | 15:03 | 20:53:00 |            |



|    |                        |      |             |                  |                                                         |       |       |     |       |      |       |       |       |                    |          |       |          |       |
|----|------------------------|------|-------------|------------------|---------------------------------------------------------|-------|-------|-----|-------|------|-------|-------|-------|--------------------|----------|-------|----------|-------|
| 59 | Smith et al.           | 2002 | UK          | SwanseaSheffield | Swansea & Sheffield: means used                         | 20,30 |       | 165 | 31,60 | 6,30 | 60,70 | 52,00 | 9,80  | klimadiagram me.de | 04:58:00 | 16:39 | 21:37:00 | Wales |
| 59 | Smith et al.           | 2002 | Netherlands | Maastricht       |                                                         | 21,10 |       | 281 | 30,10 | 7,40 | 73,10 | 51,00 | 9,50  | klimadiagram me.de | 05:24:00 | 16:31 | 21:55:00 |       |
| 59 | Smith et al.           | 2002 | Spain       | Barcelona        |                                                         | 19,90 |       | 159 | 33,90 | 5,80 | 79,20 | 41,00 | 15,50 | klimadiagram me.de | 06:18:00 | 15:10 | 21:28:00 |       |
| 59 | Smith et al.           | 2002 | Colombia    | Bogota           | BOGOTA used for temperature                             | 23,60 |       | 293 | 42,40 | 5,70 | 65,30 | 5,00  | 13,30 | klimadiagram me.de | 05:47:00 | 12:23 | 18:10:00 |       |
| 59 | Smith et al.           | 2002 | USA         | Ohio             |                                                         | 19,00 |       | 551 | 31,40 | 6,80 | 70,50 | 41,00 | 10,10 | weatherbase.com    | 05:27:00 | 14:42 | 20:09:00 |       |
| 59 | Smith et al.           | 2002 | India       | Calcutta         |                                                         | 21,80 |       | 300 | 39,40 | 6,40 | 39,70 | 22,00 | 26,90 | klimadiagram me.de | 04:53:00 | 13:31 | 18:24:00 |       |
| 60 | Soehner et al.         | 2007 | USA         | Pittsburgh       |                                                         | 32,40 | 9,90  | 54  | 36,60 | 7,50 | 44,30 | 40,00 | 10,20 | klimadiagram me.de | 05:50:00 | 15:03 | 20:53:00 |       |
| 61 | Soehner et al.         | 2011 | USA         | Pittsburgh       |                                                         | 31,51 | 5,93  | 62  | 37,15 | 7,60 | 66,10 | 40,00 | 10,20 | klimadiagram me.de | 05:50:00 | 15:03 | 20:53:00 |       |
| 62 | Stolarski & Jankowski  | 2014 | Poland      | Warsaw           |                                                         | 21,60 | 2,62  | 182 | 32,85 | 7,18 | 73,63 | 52,00 | 7,80  | klimadiagram me.de | 04:14:00 | 16:46 | 21:00:00 |       |
| 63 | Thun et al.            | 2013 | Norway      | Bergen           |                                                         | 21,40 | 2,20  | 166 | 33,20 | 6,40 | 56,02 | 60,00 | 7,80  | klimadiagram me.de | 04:10:00 | 19:01 | 23:11:00 |       |
| 64 | Voinescu et al.        | 2010 | Romania     | Cluj-Napoca      |                                                         | 35,14 | 14,45 | 205 | 37,36 | 7,24 | 65,40 | 46,00 | 8,20  | klimadiagram me.de | 05:32:00 | 15:51 | 21:23:00 |       |
| 65 | Voinescu et al.        | 2011 | Romania     | Cluj-Napoca      | only control group used                                 | 47,16 | 10,53 | 102 | 42,00 |      | 51,96 | 46,00 | 8,20  | klimadiagram me.de | 05:32:00 | 15:51 | 21:23:00 |       |
| 66 | Voinescu & Szentagotai | 2015 | Romania     | Cluj-Napoca used | three large cities in Romania                           | 29,20 | 10,90 | 652 | 34,80 | 7,40 | 73,60 | 46,00 | 8,20  | klimadiagram me.de | 05:32:00 | 15:51 | 21:23:00 |       |
| 67 | Waage et al.           | 2009 | Norway      | Bergen used      | geographical mean from Norway used: 64°N, 5% women used | 39,80 | 10,20 | 96  | 37,72 | 4,95 | 5,00  | 64,00 | 7,80  | klimadiagram me.de | 04:10:00 | 19:01 | 23:11:00 |       |
| 68 | Wood et al.            | 2009 | USA         | Pittsburgh       | only control group from study; MEDIAN used              | 40,51 |       | 128 | 39,00 |      | 76,60 | 40,00 | 10,20 | klimadiagram me.de | 05:50:00 | 15:03 | 20:53:00 |       |
| 69 | Zickar et al.          | 2002 | USA         | Bowling Green    |                                                         | 42,50 |       | 180 | 36,86 | 9,07 |       | 41,00 | 10,10 | waetherbase.com    | 05:27:00 | 14:42 | 20:09:00 |       |

**Supplement3: Excluded studies and exclusion criteria.**

**PT J --- excluded adolescents**

AU Randler, C

Weber, V

AF Randler, Christoph

Weber, Vanessa

TI Positive and negative affect during the school day and its relationship  
to morningness-eveningness

SO BIOLOGICAL RHYTHM RESEARCH

**PT J --- excluded review**

AU Tonetti, L

Adan, A

Di Milia, L

Randler, C

Natale, V

AF Tonetti, L.

Adan, A.

Di Milia, L.

Randler, C.

Natale, V.

TI Measures of circadian preference in childhood and adolescence: A review

SO EUROPEAN PSYCHIATRY

AB Purpose:

**PT J --- excluded Randler study, explanation see methods**

AU Randler, C

Luffer, M

Muller, M

AF Randler, Christoph

Luffer, Manuela

Mueller, Melanie

TI Morningness in Teachers is Related to a Higher Sense of Coherence and  
Lower Burnout

SO SOCIAL INDICATORS RESEARCH

TC 0

Z9 0

SN 0303-8300

EI 1573-0921

PD JUN

PY 2015

VL 122

IS 2

BP 595

EP 606

DI 10.1007/s11205-014-0699-2

UT WOS:000353792100014

ER

**PT J --- internet sampling across USA (whole country)**

AU Wang, LL

Chartrand, TL

AF Wang, Lili

Chartrand, Tanya L.

TI Morningness-Eveningness and Risk Taking

SO JOURNAL OF PSYCHOLOGY

TC 0

Z9 0

SN 0022-3980

EI 1940-1019

PD MAY 19

PY 2015

VL 149

IS 4

BP 394

EP 411

DI 10.1080/00223980.2014.885874

UT WOS:000353335000005

PM 25901637

ER

**PT J --- excluded children**

AU Arbabi, T

Vollmer, C

Dorfler, T

Randler, C

AF Arbabi, Talat

Vollmer, Christian

Doerfler, Tobias

Randler, Christoph

TI The influence of chronotype and intelligence on academic achievement in primary school is mediated by conscientiousness, midpoint of sleep and motivation

SO CHRONOBIOLOGY INTERNATIONAL

TC 0

Z9 0

SN 0742-0528

EI 1525-6073

PD APR

PY 2015

VL 32

IS 3

BP 349

EP 357

**PT J --- CSM scores not reported**

AU Kang, Ji

Park, Ci

Sohn, SY

Kim, HW

Namkoong, K

Kim, SJ

AF Kang, Jee In

Park, Chun Il

Sohn, Sung-yun

Kim, Hae Won

Namkoong, Kee

Kim, Se Joo

TI Circadian preference and trait impulsivity, sensation-seeking and  
response inhibition in healthy young adults

SO CHRONOBIOLOGY INTERNATIONAL

TC 0

Z9 0

SN 0742-0528

EI 1525-6073

PD MAR

PY 2015

VL 32

IS 2

BP 235

EP 241

DI 10.3109/07420528.2014.965313

UT WOS:000351005100008

**PT J --- excluded Randler study, explanation see methods**

AU Randler, C

Goma-i-Freixanet, M

Muro, A

Knauber, C

Adan, A

AF Randler, Christoph

Goma-i-Freixanet, Montserrat

Muro, Anna

Knauber, Christina

Adan, Ana

TI Do different circadian typology measures modulate their relationship

with personality? A test using the Alternative Five Factor Model

SO CHRONOBIOLOGY INTERNATIONAL

TC 0

Z9 0

SN 0742-0528

EI 1525-6073

PD 00351005100015

PM 25290037

ER



**PT J --- excluded Randler, explanation see methods**

AU Werner, L

Geisler, J

Randler, C

AF Werner, Laura

Geisler, Jennifer

Randler, Christoph

TI Morningness as a Personality Predictor of Punctuality

SO CURRENT PSYCHOLOGY

TC 0

Z9 0

SN 1046-1310

EI 1936-4733

PD MAR

PY 2015

VL 34

IS 1

BP 130

EP 139

DI 10.1007/s12144-014-9246-1

UT WOS:000350802900011

ER

**PT J ---excluded whole USA**

AU Cole, J

AF Cole, James S.

TI A survey of college-bound high school graduates regarding circadian preference, caffeine use, and academic performance

SO SLEEP AND BREATHING

TC 0

Z9 0

SN 1520-9512

EI 1522-1709

PD MAR

PY 2015

VL 19

IS 1

BP 123

EP 127

DI 10.1007/s11325-014-0976-y

UT WOS:000349983900027

PM 24788599

ER

**PT J --- not CSM**

AU Simor, P

Zavecz, Z

Palosi, V

Torok, C

Koteles, F

AF Simor, Peter

Zavecz, Zsafia

Palosi, Vivien

Toeroek, Csenge

Koeteles, Ferenc

TI The influence of sleep complaints on the association between chronotype  
and negative emotionality in young adults

SO CHRONOBIOLOGY INTERNATIONAL

TC 0

Z9 0

SN 0742-0528

EI 1525-6073

PD FEB

**PT J --- clinical**

AU Lee, YJ

Park, J

Kim, S

Cho, SJ

Kim, SJ

AF Lee, Yu Jin

Park, Juhyun

Kim, Soohyun

Cho, Seong-Jin

Kim, Seog Ju

TI Academic Performance among Adolescents with Behaviorally Induced

Insufficient Sleep Syndrome

SO JOURNAL OF CLINICAL SLEEP MEDICINE

TC 0

Z9 0

SN 1550-9389

EI 1550-9397

PY 2015

VL 11

IS 1

BP 61

EP 68

DI 10.5664/jcsm.4368

UT WOS:000351167800011

PM 25515277

ER

**PT J – no CSM data**

AU Putilov, AA

Donskaya, OG

Verevkin, EG

AF Putilov, Arcady A.

Donskaya, Olga G.

Verevkin, Evgeniy G.

TI How many diurnal types are there? A search for two further "bird species"

SO PERSONALITY AND INDIVIDUAL DIFFERENCES

TC 0

Z9 0

SN 0191-8869

PD JAN

PY 2015

VL 72

BP 12

EP 17

DI 10.1016/j.paid.2014.08.003

UT WOS:000351193400003

ER

**PT J --- overlap with Jankowski et al. (2014)**

AU Jankowski, KS

AF Jankowski, K. S.

TI Composite Scale of Morningness: Psychometric properties, validity with  
Munich ChronoType Questionnaire and age/sex differences in Poland

SO EUROPEAN PSYCHIATRY

TC 7

Z9 7

SN 0924-9338

EI 1778-3585

PD JAN

PY 2015

VL 30

IS 1

DI 10.1016/j.eurpsy.2014.01.004

UT WOS:000348032300026

PM 24630377

ER

**PT J --- adolescents**

AU Randler, C

Rahafar, A

Arbabi, T

Bretschneider, R

AF Randler, Christoph

Rahafar, Arash

Arbabi, Talat

Bretschneider, Rebekka

TI Affective State of School Pupils During Their First Lesson of the  
Day-Effect of Morningness-Eveningness

SO MIND BRAIN AND EDUCATION

TC 1

Z9 1

SN 1751-2271

EI 1751-228X

PD DEC

PY 2014

VL 8

IS 4

BP 214

EP 219

DI 10.1111/mbe.12060

UT WOS:000345227900006

ER

**PT J --- adolescents**

AU Randler, C

Vollmer, C

Besoluk, S

Onder, I

Horzum, MB

AF Randler, Christoph

Vollmer, Christian

Besoluk, Senol

Oender, Ismail

Horzum, Mehmet Baris

TI Age and gender differences in morningness-eveningness in Turkish

adolescents and young adults

SO BIOLOGICAL RHYTHM RESEARCH

TC 1

Z9 1

SN 0929-1016

EI 1744-4179

PD MAR 4

PY 2014

VL 45

IS 2

BP 277

EP 284

DI 10.1080/09291016.2013.805915

UT WOS:000332277000013

ER



**PT J CSM scores not reported**

AU Bhatti, P

Mirick, DK

Davis, S

AF Bhatti, Parveen

Mirick, Dana K.

Davis, Scott

TI The impact of chronotype on melatonin levels among shift workers

SO OCCUPATIONAL AND ENVIRONMENTAL MEDICINE

TC 5

Z9 5

SN 1351-0711

EI 1470-7926

PD MAR

PY 2014

VL 71

IS 3

BP 195

EP 200

DI 10.1136/oemed-2013-101730

UT WOS:000330849700008

PM 24399070

ER

**PT J – no CSM**

AU Biswas, A

Adan, A

Haldar, P

Majumder, D

Natale, V

Randler, C

Tonetti, L

Sahu, S

AF Biswas, Animesh

Adan, Ana

Haldar, Prasun

Majumder, Debasish

Natale, Vincenzo

Randler, Christoph

Tonetti, Lorenzo

Sahu, Subhashis

TI Exploration of transcultural properties of the reduced version of the Morningness-Eveningness Questionnaire (rMEQ) using adaptive neuro-fuzzy inference system

SO BIOLOGICAL RHYTHM RESEARCH

TC 1

Z9 1

SN 0929-1016

EI 1744-4179

PY 2014

VL 45

IS 6

BP 955

EP 968

DI 10.1080/09291016.2014.939442

UT WOS:000342312800012

ER

**PT J --- duplicate dataset Jankowski et al. (2014)**

AU Randler, C

Jankowski, KS

AF Randler, Christoph

Jankowski, Konrad S.

TI Evidence for the validity of the composite scale of morningness based on students from Germany and Poland - relationship with sleep-wake and social schedules

SO BIOLOGICAL RHYTHM RESEARCH

TC 2

Z9 2

SN 0929-1016

EI 1744-4179

PY 2014

VL 45

IS 4

BP 653

EP 659

DI 10.1080/09291016.2014.884307

UT WOS:000337580100017

ER

**PT J --- overlap with Monk et al. (2011)**

AU Monk, TH

    Buysse, DJ

AF Monk, Timothy H.

    Buysse, Daniel J.

TI Chronotype, bed timing and total sleep time in seniors

SO CHRONOBIOLOGY INTERNATIONAL

TC 1

Z9 1

SN 0742-0528

EI 1525-6073

PY 2014

VL 31

IS 5

BP 655

EP 659

DI 10.3109/07420528.2014.885981

UT WOS:000336971900006

PM 24517139

ER

**PT J – clinical sample**

AU Corruble, E

Frank, E

Gressier, F

Courtet, P

Bayle, F

Llorca, PM

Vaiva, G

Gorwood, P

AF Corruble, Emmanuelle

Frank, Ellen

Gressier, Florence

Courtet, Philippe

Bayle, Frank

Llorca, Pierre-Michel

Vaiva, Guillaume

Gorwood, Philip

TI Morningness-eveningness and treatment response in major depressive disorder

SO CHRONOBIOLOGY INTERNATIONAL

TC 2

Z9 2

SN 0742-0528

EI 1525-6073

PY 2014

VL 31

IS 2

BP 283

EP 289

DI 10.3109/07420528.2013.834924

UT WOS:000331148700016

PM 24128195

ER

**PT J --- adolescents**

AU Koscec, A

Radosevic-Vidacek, B

Bakotic, M

AF Koscec, Adrijana

Radosevic-Vidacek, Biserka

Bakotic, Marija

TI Morningness-eveningness and sleep patterns of adolescents attending  
school in two rotating shifts

SO CHRONOBIOLOGY INTERNATIONAL

RI Radosevic-Vidacek, Biserka/C-2986-2013; Bakotic, Marija/G-8274-2015

OI Radosevic-Vidacek, Biserka/0000-0001-7445-7335;

TC 3

Z9 3

SN 0742-0528

EI 1525-6073PM 24131149

ER

**PT J ---overlap with Ojeda et al. (2013)**

AU Ojeda, DA

Perea, CS

Suarez, A

Nino, CL

Gutierrez, RM

Lopez-Leon, S

Adan, A

Arboleda, H

Camargo, A

Forero, DA

AF Ojeda, Diego A.

Perea, Claudia S.

Suarez, Annjy

Nino, Carmen L.

Gutierrez, Rafael M.

Lopez-Leon, Sandra

Adan, Ana

Arboleda, Humberto

Camargo, Andres

Forero, Diego A.

TI Common functional polymorphisms in SLC6A4 and COMT genes are associated  
with circadian phenotypes in a South American sample

SO NEUROLOGICAL SCIENCES

RI Adan, Ana /B-3643-2011; Forero, Diego/A-9305-2008

OI Adan, Ana /0000-0002-3328-3452; Forero, Diego/0000-0001-9175-3363

**PT J children**

AU Randler, C

Truc, Y

AF Randler, Christoph

Truc, Yvonne

TI Adaptation of the Composite Scale of Morningness for Parent Report and

Results from Kindergarten Children

SO SWISS JOURNAL OF PSYCHOLOGY

TC 4

Z9 4

SN 1421-0185

EI 1662-0879

PY 2014

VL 73

IS 1

BP 35

EP 39

DI 10.1024/1421-0185/a000121

UT WOS:000328958700004

ER



**PT J --- Randler study, explanation see methods**

AU Randler, C

Vollmer, C

AF Randler, Christoph

Vollmer, Christian

TI AGGRESSION IN YOUNG ADULTS - A MATTER OF SHORT SLEEP AND SOCIAL JETLAG?

SO PSYCHOLOGICAL REPORTS

RI Vollmer, Christian/K-8253-2012

OI Vollmer, Christian/0000-0002-7763-7013

TC 3

Z9 3

SN 0033-2941

PD DEC

PY 2013

VL 113

IS 3

BP 754

EP 765

DI 10.2466/16.02.PRO.113x31z7

UT WOS:000331072500004

PM 24693810

ER

**PT J --- sample (veterans)**

AU Hasler, BP

Insana, SP

James, JA

Germain, A

AF Hasler, Brant P.

Insana, Salvatore P.

James, Jeffrey A.

Germain, Anne

TI Evening-type military veterans report worse lifetime posttraumatic stress symptoms and greater brainstem activity across wakefulness and REM sleep

SO BIOLOGICAL PSYCHOLOGY.

TC 1

Z9 1

SN 0301-0511

EI 1873-6246

PD OCT

PY 2013

VL 94

IS 2

BP 255

EP 262

DI 10.1016/j.biopsycho.2013.06.007

UT WOS:000325462900004

PM 23831547

ER

J

**AU Randler, C --- Randler sample, explanation see methods**

AF Randler, Christoph

TI German version of the reduced Morningness-Eveningness Questionnaire  
(rMEQ)

SO BIOLOGICAL RHYTHM RESEARCH

TC 5

Z9 5

SN 0929-1016

EI 1744-4179

PD OCT 1

PY 2013

VL 44

IS 5

BP 730

EP 736

DI 10.1080/09291016.2012.739930

UT WOS:000324515500005

ER

**PT J --- adolescents**

AU Kauderer, S

Randler, C

AF Kauderer, Simone

Randler, Christoph

TI Differences in time use among chronotypes in adolescents

SO BIOLOGICAL RHYTHM RESEARCH

TC 2

Z9 2

SN 0929-1016

PD AUG 1

PY 2013

VL 44

IS 4

BP 601

EP 608

DI 10.1080/09291016.2012.721687

UT WOS:000321691400008

ER

**PT J no CSM data**

AU Jankowski, KS

AF Jankowski, Konrad S.

TI Polish version of the reduced MorningnessEveningness Questionnaire

SO BIOLOGICAL RHYTHM RESEARCH

TC 8

Z9 8

SN 0929-1016

PD JUN 1

PY 2013

VL 44

IS 3

BP 427

EP 433

DI 10.1080/09291016.2012.704791

UT WOS:000318779100009

ER

**PT J no CSM data**

AU Putilov, AA

Verevkin, EG

Donskaya, OG

AF Putilov, Arcady A.

Verevkin, Evgeniy G.

Donskaya, Olga G.

TI Overall and specific relationships between inter-individual variations  
in personality and sleepwake adaptability

SO BIOLOGICAL RHYTHM RESEARCH

RI Putilov, Arcady/E-2010-2011

OI Putilov, Arcady/0000-0003-2779-9046

TC 0

Z9 0

SN 0929-1016

PD APR 1

PY 2013

VL 44

IS 2

BP 287

EP 311

DI 10.1080/09291016.2012.681847

UT WOS:000315567800010

ER

**PT J children**

AU Onder, I

Besoluk, S

AF Onder, Ismail

Besoluk, Senol

TI Adaptation of the morningness eveningness scale for children into

Turkish

SO BIOLOGICAL RHYTHM RESEARCH.

TC 1

Z9 1

SN 0929-1016

PD APR 1

PY 2013

VL 44

IS 2

BP 313

EP 323

DI 10.1080/09291016.2012.681848

UT WOS:000315567800011

ER

**PT J Review**

AU Di Milia, L

Adan, A

Natale, V

Randler, C

AF Di Milia, Lee

Adan, Ana

Natale, Vincenzo

Randler, Christoph

TI Reviewing the Psychometric Properties of Contemporary Circadian Typology  
Measures

SO CHRONOBIOLOGY INTERNATIONAL

RI Adan, Ana /B-3643-2011

OI Adan, Ana /0000-0002-3328-3452

TC 26

Z9 26

SN 0742-0528

EI 1525-

UT WOS:000326987500008

PM 24001393

ER



PT J **clinical**, small sample

AU Boudebessé, C

Geoffroy, PA

Bellivier, F

Henry, C

Folkard, S

Leboyer, M

Etain, B

AF Boudebessé, Carole

Geoffroy, Pierre Alexis

Bellivier, Frank

Henry, Chantal

Folkard, Simon

Leboyer, Marion

Etain, Bruno

TI Correlations between objective and subjective sleep and circadian  
markers in remitted patients with bipolar disorder

SO CHRONOBIOLOGY INTERNATIONAL

TC 7

Z9 7

SN EP 704

DI 10.3109/07420528.2014.895742

UT WOS:000336971900011

PM 24625313

ER

**PT J Randler sample, explanation see methods**

AU Di Milia, L

Randler, C

AF Di Milia, Lee

Randler, Christoph

TI The stability of the morning affect scale across age and gender

SO PERSONALITY AND INDIVIDUAL DIFFERENCES

TC 11

Z9 11

SN 0191-8869

PD JAN

PY 2013

VL 54

IS 2

BP 298

EP 301

DI 10.1016/j.paid.2012.08.031

UT WOS:000312926900029

ER

**PT J Randler sample, explanation see methods**

AU Randler, C

Ebenhoh, N

Fischer, A

Hochel, S

Schroff, C

Stoll, JC

Vollmer, C

AF Randler, Christoph

Ebenhoeh, Nadine

Fischer, Arian

Hoechel, Sandra

Schroff, Christina

Stoll, Julia Christin

Vollmer, Christian

TI Chronotype but not sleep length is related to salivary testosterone in young adult men

SO PSYCHONEUROENDOCRINOLOGY

Z9 24

SN 0306-4530

PD OCT

PY 2012

VL 37

IS 10

BP 1740

EP 1744

DI 10.1016/j.psyneuen.2012.02.008

UT WOS:000309097300015

PM 22425131

ER

**PT J clinical**

AU Suh, S

Nowakowski, S

Bernert, RA

Ong, JC

Siebern, AT

Dowdle, CL

Manber, R

AF Suh, Sooyeon

Nowakowski, Sara

Bernert, Rebecca A.

Ong, Jason C.

Siebern, Allison T.

Dowdle, Claire L.

Manber, Rachel

TI Clinical significance of night-to-night sleep variability in insomnia

SO SLEEP MEDICINE

TC 6

Z9 6

SN 1389-9457

PD MAY

PY 2012

VL 13

IS 5

BP 469

**PT J adolescents**

AU Vollmer, C

Randler, C

AF Vollmer, Christian

Randler, Christoph

TI Circadian preferences and personality values: Morning types prefer social values, evening types prefer individual values

SO PERSONALITY AND INDIVIDUAL DIFFERENCES

RI Vollmer, Christian/G-5084-2012; Vollmer, Christian/K-8253-2012

OI Vollmer, Christian/0000-0002-7763-7013

TC 12

Z9 12

SN 0191-8869

PD APR

PY 2012

VL 52

IS 6

BP 738

EP 743

DI 10.1016/j.paid.2012.01.001

UT WOS:000301623900016

ER

**PT J --- meeting abstract**

AU Chung, JK

Lee, KY

Jeong, SH

Kim, EJ

Ahn, YM

Joo, EJ

AF Chung, J. K.

Lee, K. Y.

Jeong, S. H.

Kim, E. J.

Ahn, Y. M.

Joo, E. J.

TI More eveningness in the patients with BP type II than BP type I disorder

SO BIPOLAR DISORDERS

CT 5th Biennial Conference of the

International-Society-for-Bipolar-Disorders

CY MAR 14-17, 2012

CL Istanbul, TURKEY

TC 0

Z9 0

SN 1398-5647

PD MAR

PY 2012

VL 14

SU 1

SI SI

BP 86

EP 86

UT WOS:000301531000197

ER

**PT J adolescents**

AU Vollmer, C

Randler, C

Di Milia, L

AF Vollmer, Christian

Randler, Christoph

Di Milia, Lee

TI Further Evidence for the Influence of Photoperiod at Birth on Chronotype  
in a Sample of German Adolescents

SO CHRONOBIOLOGY INTERNATIONAL

RI Vollmer, Christian/K-8253-2012

OI Vollmer, Christian/0000-0002-7763-7013

TC 4

Z9 4

SN 0742-0528

PY 2012

VL 29

IS 10

BP 1345

EP 1351

DI 10.3109/07420528.2012.728656

UT WOS:000311837200006

PM 23130997

ER

**PT J no CSM data**

AU Ottoni, GL

Antoniolli, E

Lara, DR

AF Ottoni, Gustavo L.

Antoniolli, Eduardo

Lara, Diogo R.

TI Circadian Preference Is Associated With Emotional and Affective  
Temperaments

SO CHRONOBIOLOGY INTERNATIONAL

TC 10

Z9 11

SN 0742-0528

PY 2012

VL 29

IS 6

BP 786

EP 793

DI 10.3109/07420528.2012.679329

UT WOS:000305756700014

PM 22734579

ER



**PT J Randler sample, explanation see methods**

AU Randler, C

Stadler, L

Vollmer, C

Diaz-Morales, JF

AF Randler, Christoph

Stadler, Lisa

Vollmer, Christian

Francisco Diaz-Morales, Juan

TI Relationship Between Depressive Symptoms and Sleep Duration/Chronotype  
in Women

SO JOURNAL OF INDIVIDUAL DIFFERENCES F./0000-0002-3894-7908

TC 8

Z9 9

SN 1614-0001

PY 2012

VL 33

IS 3

BP 186

EP 191

DI 10.1027/1614-0001/a000089

UT WOS:000304974100007

ER

**PT J --- binge drinkers, special group**

AU Adan, A

AF Adan, Ana

TI Functional and dysfunctional impulsivity in young binge drinkers

SO ADICCIONES

RI Adan, Ana /B-3643-2011

OI Adan, Ana /0000-0002-3328-3452

TC 4

Z9 4

SN 0214-4840

PY 2012

VL 24

IS 1

BP 17

EP 22

UT WOS:000301024900003

PM 22508013

ER

**PT J Randler sample, explanation see methods**

AU Randler, C

Vollmer, C

AF Randler, Christoph

Vollmer, Christian

TI Epidemiological Evidence for the Bimodal Chronotype Using the Composite

Scale of Morningness

SO CHRONOBIOLOGY INTERNATIONAL

RI Vollmer, Christian/G-5084-2012; Vollmer, Christian/K-8253-2012

OI Vollmer, Christian/0000-0002-7763-7013

TC 4

Z9 4

SN 0742-0528

PY 2012

VL 29

IS 1

BP 1

EP 4

DI 10.3109/07420528.2011.635233

UT WOS:000298858800001

PM 22217095

ER

**PT J --- adolescents**

AU Vollmer, C

Schaal, S

Hummel, E

Randler, C

AF Vollmer, Christian

Schaal, Steffen

Hummel, Eberhard

Randler, Christoph

TI Association Among School-related, Parental and Self-related Problems and  
Morningness-Eveningness in Adolescents

SO STRESS AND HEALTH

RI Vollmer, Christian/G-5084-2012; Vollmer, Christian/K-8253-2012

OI Vollmer, Christian/0000-0002-7763-7013

TC 16

Z9 16

SN 1532-3005

PD DEC

PY 2011

VL 27

IS 5

BP 413

EP 419

DI 10.1002/smi.1393

UT WOS:000298298900008

ER

PT J

**AU Lee, HJ --- overlap with other Korean studies**

Kim, L

Kang, SG

Yoon, HK

Choi, JE

Park, YM

Kim, SJ

Kripke, DF

AF Lee, Heon-Jeong

Kim, Leen

Kang, Seung-Gul

Yoon, Ho-Kyoung

Choi, Jung-Eun

Park, Young-Min

Kim, Seog Ju

Kripke, Daniel F.

TI PER2 Variation is Associated with Diurnal Preference in a Korean Young

Population

SO BEHAVIOR GENETICS

TC 9

Z9 9

SN 0001-8244

PD MAR

PY 2011

VL 41

IS 2

BP 273

EP 277

DI 10.1007/s10519-010-9396-3

UT WOS:000287749700011

PM 20931356

ER

**PT J adolescents**

AU Lange, L

Randler, C

AF Lange, Luisa

Randler, Christoph

TI Morningness-eveningness and behavioural problems in adolescents

SO SLEEP AND BIOLOGICAL RHYTHMS

TC 20

Z9 20

SN 1446-9235

PD JAN

PY 2011

VL 9

IS 1

BP 12

EP 18

DI 10.1111/j.1479-8425.2010.00478.x

UT WOS:000286329900003

ER

**PT J adolescents**

AU Fromm, E

Horlebein, C

Meergans, A

Niesner, M

Randler, C

AF Fromm, Evantina

Horlebein, Christina

Meergans, Alexandra

Niesner, Marianne

Randler, Christoph

TI Evaluation of a dawn simulator in children and adolescents

SO BIOLOGICAL RHYTHM RESEARCH

TC 4

Z9 4

SN 0929-1016

PY 2011

VL 42

IS 5

BP 417

EP 425

DI 10.1080/09291016.2010.525851

UT WOS:000299786700005

ER

**PT J no CSM data**

AU Di Milia, L

Folkard, S

Hill, J

Walker, C

AF Di Milia, Lee

Folkard, Simon

Hill, Joanne

Walker, Curtis, Jr.

TI A Psychometric Assessment of the Circadian Amplitude and Phase Scale

SO CHRONOBIOLOGY INTERNATIONAL

TC 4

Z9 4

SN 0742-0528

PY 2011

VL 28

IS 1

BP 81

EP 87

DI 10.3109/07420528.2010.502603

UT WOS:000285582900010

PM 21182408

ER



**PT J no CSM data**

AU Besoluk, S

Onder, I

Deveci, I

AF Besoluk, Senol

Onder, Ismail

Deveci, Isa

TI Morningness-Eveningness Preferences and Academic Achievement of  
University Students

SO CHRONOBIOLOGY INTERNATIONAL

TC 40

Z9 40

SN 0742-0528

PY 2011

VL 28

IS 2

BP 118

EP 125

DI 10.3109/07420528.2010.540729

UT WOS:000286901900004

PM 21231873

ER

**PT J --- sample overlap with Prat & Adan**

AU Prat, G

Adan, A

AF Prat, Gemma

Adan, Ana

TI Influence of Circadian Typology on Drug Consumption, Hazardous Alcohol  
use, and Hangover Symptoms

SO CHRONOBIOLOGY INTERNATIONAL

RI Adan, Ana /B-3643-2011

OI Adan, Ana /0000-0002-3328-3452

TC 35

Z9 35

SN 0742-0528

PY 2011

VL 28

IS 3

BP 248

EP 257

DI 10.3109/07420528.2011.553018

UT WOS:000289000900007

PM 21452920

ER

**PT J Randler sample, explanation see methods**

AU Randler, C

Kretz, S

AF Randler, Christoph

Kretz, Stefanie

TI Assortative mating in morningness-eveningness

SO INTERNATIONAL JOURNAL OF PSYCHOLOGY

TC 10

Z9 10

SN 0020-7594

PY 2011

VL 46

IS 2

BP 91

EP 96

DI 10.1080/00207594.2010.518237

UT WOS:000288667900002

PM 22044180

ER

PT J

**AU Randler, C adolescents**

AF Randler, Christoph

TI Age and Gender Differences in Morningness-Eveningness During Adolescence

SO JOURNAL OF GENETIC PSYCHOLOGY

TC 22

Z9 22

SN 0022-1325

PY 2011

VL 172

IS 3

BP 302

EP 308

DI 10.1080/00221325.2010.535225

UT WOS:000300000500006

PM 21902008

ER

PT J

AU Randler, C **adolescents**

Saliger, L

AF Randler, Christoph

Saliger, Lena

TI Relationship between morningness-eveningness and temperament and

character dimensions in adolescents

SO PERSONALITY AND INDIVIDUAL DIFFERENCES

TC 18

Z9 19

SN 0191-8869

PD JAN

PY 2011

VL 50

IS 2

BP 148

EP 152

DI 10.1016/j.paid.2010.09.016

UT WOS:000285233000004

ER

PT J

AU Randler, C **adolescents**

AF Randler, Christoph

TI Association between morningness-eveningness and mental and physical health in adolescents

SO PSYCHOLOGY HEALTH & MEDICINE

TC 35

Z9 35

SN 1354-8506

EI 1465-3966

PY 2011

VL 16

IS 1

BP 29

EP 38

DI 10.1080/13548506.2010.521564

UT WOS:000286815400004

PM 21218362

ER

**PT J – no CSM data reported**

AU Lee, KY

Song, JY

Kim, SH

Kim, SC

Joo, EJ

Ahn, YM

Kim, YS

AF Lee, Kyu Young

Song, Joo Yun

Kim, Se Hyun

Kim, Seong Chan

Joo, Eun-Jeong

Ahn, Yong Min

Kim, Yong Sik

TI Association between CLOCK 3111T/C and preferred circadian phase in  
Korean patients with bipolar disorder

SO PROGRESS IN NEURO-PSYCHOPHARMACOLOGY & BIOLOGICAL PSYCHIATRY

TC 23

Z9 24

SN 0278-5846

PD OCT 1

PY 2010

VL 34ER

PT J

AU Buschkens, J – **small sample**, special group

Graham, D

Cottrell, D

AF Buschkens, Jane

Graham, Deborah

Cottrell, David

TI Well-Being Under Chronic Stress: Is Morningness an Advantage?

SO STRESS AND HEALTH

RI Cottrell, David/I-6811-2013

OI Cottrell, David/0000-0002-2405-6362

TC 8

Z9 8

SN 1532-3005

PD OCT

PY 2010

VL 26

IS 4

BP 330

EP 340

DI 10.1002/smi.1300

UT WOS:000283274800007

ER



PT J

AU Randler, C **Randler sample, explanation see methods**

Schaal, S

AF Randler, Christoph

Schaal, Steffen

TI Morningness-eveningness, habitual sleep-wake variables and cortisol

level

SO BIOLOGICAL PSYCHOLOGY

TC 45

Z9 45

SN 0301-0511

PD SEP

PY 2010

VL 85

IS 1

BP 14

EP 18

DI 10.1016/j.biopsycho.2010.04.006

UT WOS:000281182600002

PM 20450953

ER

PT J – **Randler sample, explanation see methods**

AU Randler, C

Bausback, V

AF Randler, Christoph

Bausback, Vanessa

TI Morningness-eveningness in women around the transition through menopause  
and its relationship with climacteric complaints

SO BIOLOGICAL RHYTHM RESEARCH

TC 10

Z9 10

SN 0929-1016

PY 2010

VL 41

IS 6

BP 415

EP 431

DI 10.1080/09291010903407631

UT WOS:000284408200001

ER

PT J – **no CSM data**

AU Clarisse, R

Le Floc'h, N

Kindelberger, C

Feunteun, P

AF Clarisse, Rene

Le Floc'h, Nadine

Kindelberger, Cecile

Feunteun, Patrick

TI DAILY RHYTHMICITY OF ATTENTION IN MORNING- VS. EVENING-TYPE ADOLESCENTS

AT BOARDING SCHOOL UNDER DIFFERENT PSYCHOSOCIOLOGICAL TESTING CONDITIONS

SO CHRONOBIOLOGY INTERNATIONAL

TC 14

Z9 14

SN 0742-0528

PY 2010

VL 27

IS 4

BP 826

EP 841

DI 10.3109/07420521003794051

UT WOS:000282027300008

PM 20560713

ER

PT J **adolescents**

AU Schmidt, S

Randler, C

AF Schmidt, Sarah

Randler, Christoph

TI Morningness-Eveningness and Eating Disorders in a Sample of Adolescent

Girls

SO JOURNAL OF INDIVIDUAL DIFFERENCES

TC 19

Z9 20

SN 1614-0001

PY 2010

VL 31

IS 1

BP 38

EP 45

DI 10.1027/1614-0001/a000005

UT WOS:000274049300005

ER

PT J --- **adolescents**

AU Randler, C

Bilger, S

Diaz-Morales, JF

AF Randler, Christoph

Bilger, Sabrina

Francisco Diaz-Morales, Juan

TI Associations among Sleep, Chronotype, Parental Monitoring, and Pubertal  
Development among German Adolescents

SO JOURNAL OF PSYCHOLOGY

TC 39

Z9 40

SN 0022-3980

PD OCT

PY 2009

VL 143

IS 5

BP 509

EP 520

UT WOS:000271492000005

PM 19943401

ER

PT J --**adolescents**

AU Schneider, AM

Randler, C

AF Schneider, Anne-Marie

Randler, Christoph

TI Daytime sleepiness during transition into daylight saving time in  
adolescents: Are owls higher at risk?

SO SLEEP MEDICINE

TC 9

Z9 9

SN 1389-9457

PD OCT

PY 2009

VL 10

IS 9

BP 1047

EP 1050

DI 10.1016/j.sleep.2008.08.009

UT WOS:000271339000020

PM 19346161

ER

PT J

**AU Caci, H – mean CSM not reported**

Bouchez, J

Bayle, FJ

AF Caci, Herve

Bouchez, Jacques

Bayle, Franck J.

TI Inattentive Symptoms of ADHD Are Related to Evening Orientation

SO JOURNAL OF ATTENTION DISORDERS

TC 31

Z9 32

SN 1087-0547

PD JUL

PY 2009

VL 13

IS 1

BP 36

EP 41

DI 10.1177/1087054708320439

UT WOS:000276690500004

PM 19387003

ER

PT J – **Randler sample, explanation see methods**

AU Randler, C

AF Randler, Christoph

TI Validation of the full and reduced Composite Scale of Morningness

SO BIOLOGICAL RHYTHM RESEARCH

TC 39

Z9 39

SN 0929-1016

EI 1744-4179

PY 2009

VL 40

IS 5

BP 413

EP 423

DI 10.1080/09291010902731213

UT WOS:000269500500004

ER



PT J

**AU Di Milia, L --- overlap with Natale & Di Milia (2011) and Bohle et al. (2001)**

Bohle, P

AF Di Milia, Lee

Bohle, Philip

TI Morningness or Morning Affect? A Short Composite Scale of Morningness

SO CHRONOBIOLOGY INTERNATIONAL

RI Bohle, Philip/K-6397-2012

TC 20

Z9 20

SN 0742-0528

PY 2009

VL 26

IS 3

BP 494

EP 509

DI 10.1080/07420520902820954

UT WOS:000265291700008

PM 19360492

ER

**PT J Randler sample, explanation see methods**

AU Leonhard, C

Randler, C

AF Leonhard, Catherine

Randler, Christoph

TI In Sync with the Family: Children and Partners Influence the Sleep-Wake

Circadian Rhythm and Social Habits of Women

SO CHRONOBIOLOGY INTERNATIONAL

TC 28

Z9 28

SN 0742-0528

PY 2009

VL 26

IS 3

BP 510

EP 525

DI 10.1080/07420520902821101

UT WOS:000265291700009

PM 19360493

ER

**PT J --- adolescents**

AU Randler, C

Frech, D

AF Randler, Christoph

Frech, Daniela

TI Young people's time-of-day preferences affect their school performance

SO JOURNAL OF YOUTH STUDIES

TC 23

Z9 23

SN 1367-6261

PY 2009

VL 12

IS 6

BP 653

EP 667

DI 10.1080/13676260902902697

UT WOS:000274745000004

ER

**PT J Randler sample, explanation see methods**

AU Schubert, E

Randler, C

AF Schubert, Eva

Randler, Christoph

TI Association between chronotype and the constructs of the

Three-Factor-Eating-Questionnaire

SO APPETITE

TC 25

Z9 26

SN 0195-6663

PD NOV

PY 2008

VL 51

IS 3

BP 501

EP 505

DI 10.1016/j.appet.2008.03.018

UT WOS:000259930900013

PM 18479778

ER

**PT J Randler sample, explanation see methods**

AU Randler, C

AF Randler, Christoph

TI EVENING TYPES AMONG GERMAN UNIVERSITY STUDENTS SCORE HIGHER ON SENSE OF  
HUMOR AFTER CONTROLLING FOR BIG FIVE PERSONALITY FACTORS

SO PSYCHOLOGICAL REPORTS

TC 4

Z9 4

SN 0033-2941

PD OCT

PY 2008

VL 103

IS 2

BP 361

EP 370

DI 10.2466/PRO.103.2.361-370

UT WOS:000261402800005

PM 19102459

ER

**PT J Randler sample, explanation see methods**

AU Randler, C

AF Randler, Christoph

TI Morningness-eveningness, sleep-wake variables and big five personality factors

SO PERSONALITY AND INDIVIDUAL DIFFERENCES

TC 45

Z9 45

SN 0191-8869

PD JUL

PY 2008

VL 45

IS 2

BP 191

EP 196

DI 10.1016/j.paid.2008.03.007

UT WOS:000257018200012

ER

**PT J Randler sample, explanation see methods**

AU Randler, C

AF Randler, Christoph

TI Psychometric properties of the German version of the Composite Scale of Morningness

SO BIOLOGICAL RHYTHM RESEARCH

TC 43

Z9 43

SN 0929-1016

PD APR

PY 2008

VL 39

IS 2

BP 151

EP 161

DI 10.1080/09291010701424796

UT WOS:000253808000006

ER

**PT J Randler sample, explanation see methods**

AU Randler, C

AF Randler, Christoph

TI Morningness-eveningness and satisfaction with life

SO SOCIAL INDICATORS RESEARCH

TC 39

Z9 40

SN 0303-8300

PD APR

PY 2008

VL 86

IS 2

BP 297

EP 302

DI 10.1007/s11205-007-9139-x

UT WOS:000253529900007

ER



**PT J special group, small sample**

AU Monk, TH

Begley, AE

Billy, BD

Fletcher, ME

Germain, A

Mazumdar, S

Moul, DE

Shear, MK

Thompson, WK

Zarotney, JR

TI Sleep and circadian rhythms in spousally bereaved seniors

SO CHRONOBIOLOGY INTERNATIONAL

TC 10

**PT J adolescents**

AU Randler, C

AF Randler, Christoph

TI Differences in sleep and circadian preference between Eastern and  
Western German adolescents

SO CHRONOBIOLOGY INTERNATIONAL

TC 47

Z9 47

SN 0742-0528

PY 2008

VL 25

IS 4

BP 565

EP 575

DI 10.1080/07420520802257794

UT WOS:000257544100006

PM 18622816

ER

**PT J no CSM data**

AU Tonetti, L

Fabbri, M

Natale, V

AF Tonetti, Lorenzo

Fabbri, Marco

Natale, Vincenzo

TI Sex difference in sleep-time preference and sleep need: A  
cross-sectional survey among Italian pre-adolescents, adolescents, and  
adults

SO CHRONOBIOLOGY INTERNATIONAL

TC 92

Z9 92

SN 0742-0528

EI 1525-6073

PY 2008

VL 25

IS 5

BP 745

EP 759

DI 10.1080/07420520802394191

UT WOS:000259039700006

PM 18780201

ER

**PT J no CSM data**

AU Di Milia, L

Wikman, R

Smith, P

AF Di Milia, Lee

Wikman, Renee

Smith, Peter

TI Additional psychometric evidence and construct validity for a revised  
preferences scale of morningness

SO CHRONOBIOLOGY INTERNATIONAL

TC 12

Z9 12

SN 0742-0528

EI 1525-6073

PY 2008

VL 25

IS 5

BP 776

EP 787

DI 10.1080/07420520802391098

UT WOS:000259039700008

PM 18780203

ER

**PT J adolescents**

AU Randler, C

AF Randler, Christoph

TI Morningness-Eveningness Comparison in Adolescents from Different  
Countries around the World

SO CHRONOBIOLOGY INTERNATIONAL

TC 64

Z9 64

SN 0742-0528

PY 2008

VL 25

IS 6

BP 1017

EP 1028

DI 10.1080/07420520802551519

UT WOS:000260850600012

PM 19005902

ER

**PT J adolescents**

AU Diaz-Morales, JF

Randler, C

AF Diaz-Morales, Juan Francisco

Randler, Christoph

TI Morningness-Eveningness Among German and Spanish Adolescents 12-18 Years

SO EUROPEAN PSYCHOLOGIST

RI Diaz-Morales, Juan F./A-7797-2010

OI Diaz-Morales, Juan F./0000-0002-3894-7908

TC 19

Z9 19

SN 1016-9040

PY 2008

VL 13

IS 3

BP 214

EP 221

DI 10.1027/1016-9040.13.3.214

UT WOS:000260571200007

ER

**PT J Review**

AU Cavallera, GM

Giudici, S

AF Cavallera, G. M.

Giudici, S.

TI Morningness and eveningness personality: A survey in literature from

1995 up till 2006

SO PERSONALITY AND INDIVIDUAL DIFFERENCES

TC 60

Z9 60

SN 0191-8869

PD JAN

PY 2008

VL 44

IS 1

BP 3

EP 21

DI 10.1016/j.paid.2007.07.009

UT WOS:000251045000001

ER

**PT J Randler sample, explanation see methods**

AU Randler, C

AF Randler, Christoph

TI Differences between smokers and nonsmokers in morningness-eveningness

SO SOCIAL BEHAVIOR AND PERSONALITY

TC 19

Z9 20

SN 0301-2212

PY 2008

VL 36

IS 5

BP 673

EP 679

DI 10.2224/sbp.2008.36.5.673

UT WOS:000259459000010

ER



**PT J Review**

AU Randler, C

AF Randler, Christoph

TI Gender differences in morningness-eveningness assessed by self-report  
questionnaires: A meta-analysis

SO PERSONALITY AND INDIVIDUAL DIFFERENCES

TC 80

Z9 80

SN 0191-8869

PD NOV

PY 2007

VL 43

IS 7

BP 1667

EP 1675

DI 10.1016/j.paid.2007.05.004

UT WOS:000250979500003

ER

**PT J Randler sample, explanation see methods**

AU Randler, C

Diaz-Morales, JF

AF Randler, Christoph

Diaz-Morales, Juan Francisco

TI Morningness in German and Spanish students: A comparative study

SO EUROPEAN JOURNAL OF PERSONALITY

TC 40

Z9 40

SN 0890-2070

PD JUN

PY 2007

VL 21

IS 4

BP 419

EP 427

DI 10.1002/per.632

UT WOS:000247380700003

ER

**PT J no CSM data**

AU Hur, YM

AF Hur, Yoon-Mi

TI Stability of genetic influence on morningness-eveningness: a  
cross-sectional examination of South Korean twins from preadolescence to  
young adulthood

SO JOURNAL OF SLEEP RESEARCH

TC 67

Z9 67

SN 0962-1105

PD MAR

PY 2007

VL 16

IS 1

BP 17

EP 23

DI 10.1111/j.1365-2869.2007.00562.x

UT WOS:000244277500003

PM 17309759

ER

**PT J children**

AU Diaz-Morales, JF

de Leon, CD

Sorroche, MG

AF Diaz-Morales, Juan Francisco

de Leon, Celeste Davila

Gutierrez Sorroche, Maria

TI Validity of the morningness-eveningness scale for children among Spanish adolescents

SO CHRONOBIOLOGY INTERNATIONAL

TC 35

Z9 35

SN 0742-0528

PY 2007

VL 24

IS 3

BP 435

EP 447

DI 10.1080/07420520701420659

UT WOS:000247726400005

PM 17612943

ER

**PT J --- overlap with other studies**

AU Lee, HJ

Paik, JW

Kang, SG

Lim, SW

Kim, L

AF Lee, Heon-Jeong

Paik, Jong-Woo

Kang, Seung-Gul

Lim, Se-Won

Kim, Leen

TI Allelic variants interaction of clock gene and g-protein beta 3 subunit  
gene with diurnal preference

SO CHRONOBIOLOGY INTERNATIONAL

TC 17

Z9 17

SN 0742-0528

PY 2007

VL 24

IS 4

BP 589

EP 597

DI 10.1080/07420520701534632

UT WOS:000249247300002

PM 17701674

ER

**PT J --- duplicate sample with Caci et al (2005)**

AU Adan, A

Caci, H

Prat, G

AF Adan, A

Caci, H

Prat, G

TI Reliability of the Spanish version of the Composite Scale of Morningness

SO EUROPEAN PSYCHIATRY

TC 24

Z9 25

SN 0924-9338

PD NOV

PY 2005

VL 20

IS 7

BP 503

EP 509

DI 10.1016/j.eurpsy.2005.01.003

UT WOS:000233712600007

PM 16310682

ER

**PT J no CSM data**

AU Di Milia, L

Smith, PA

Folkard, S

AF Di Milia, L

Smith, PA

Folkard, S

TI A validation of the revised circadian type inventory in a working sample

SO PERSONALITY AND INDIVIDUAL DIFFERENCES

Z9 26

SN 0191-8869

PD NOV

PY 2005

VL 39

IS 7

BP 1293

EP 1305

DI 10.1016/j.paid.2005.04.012

UT WOS:000233122200012

ER

**PT J adolescence**

AU Natale, V

Sansavini, A

Trombini, E

Esposito, MJ

Alessandroni, R

Faldella, G

AF Natale, V

Sansavini, A

Trombini, E

Esposito, MJ

Alessandroni, R

Faldella, G

TI Relationship between preterm birth and circadian typology in adolescence

SO NEUROSCIENCE LETTERS

TC 7

Z9 8

SN 0304-3940

PD JUL 1

PY 2005

VL 382

IS 1-2

BP 139

EP 142

DI 10.1016/j.neulet.2005.03.004

UT WOS:000229661900027

PM 15911137

ER



**PT J special group selected**

AU Willis, TA

O'Connor, DB

Smith, L

AF Willis, TA

O'Connor, DB

Smith, L

TI The influence of morningness-eveningness on anxiety an cardiovascular responses to stress

SO PHYSIOLOGY & BEHAVIOR

TC 26

Z9 26

SN 0031-9384

PD JUN 2

PY 2005

VL 85

IS 2

BP 125

EP 133

DI 10.1016/j.physbeh.2005.03.013

UT WOS:000229805900006

PM 15924909

ER

**PT J: duplicate sample to Caci et al. (2005)**

AU Caci, H

Mattei, V

Bayle, FJ

Nadalet, L

Dossios, C

Robert, P

Boyer, P

AF Caci, H

Mattei, V

Bayle, FJ

Nadalet, L

Dossios, C

Robert, P

Boyer, P

TI Impulsivity but not venturesomeness is related to morningness

SO PSYCHIATRY RESEARCH

TC 50

Z9 50

SN 0165-1781

PD APR 30

PY 2005

VL 134

IS 3

BP 259

EP 265

DI 10.1016/j.psychres.2004.02.019

UT WOS:000229867000006

PM 15892985

ER

**PT J no CSM data**

AU Di Milia, L

AF Di Milia, L

TI A psychometric evaluation and validation of the preferences scale

SO CHRONOBIOLOGY INTERNATIONAL

TC 9

Z9 9

SN 0742-0528

PY 2005

VL 22

IS 4

BP 679

EP 693

DI 10.1080/07420520500180454

UT WOS:000232137700006

PM 16147899

ER

**PT J children**

AU Caci, H

Robert, P

Dossios, C

Boyer, P

AF Caci, H

Robert, P

Dossios, C

Boyer, P

TI Morningness-Eveningness for Children Scale: psychometric properties and  
month of birth effect

SO ENCEPHALE-REVUE DE PSYCHIATRIE CLINIQUE BIOLOGIQUE ET THERAPEUTIQUE

TC 32

Z9 VL 31:000228261500007

PM

**PT J no CSM means**

AU Caci, H

Robert, P

Boyer, P

AF Caci, H

Robert, P

Boyer, P

TI Novelty seekers and impulsive subjects are low in morningness

SO EUROPEAN PSYCHIATRY

SN 0924-9338

PD APR

PY 2004

VL 19

IS 2

BP 79

EP 84

DI 10.1016/j.eurpsy.2003.09.007

UT WOS:000220858300003

PM 15051106

ER

PT J

**AU Monk, TH --- excluded no data**

Buyse, DJ

Potts, JM

DeGrazia, JM

Kupfer, DJ

AF Monk, TH

Buyse, DJ

Potts, JM

DeGrazia, JM

Kupfer, DJ

TI Morningness-eveningness and lifestyle regularity

SO CHRONOBIOLOGY INTERNATIONAL

TC 61

Z9 62

SN 0742-0528

PY 2004

VL 21

IS 3

BP 435

EP 443

DI 10.1081/CBI-120038614

UT WOS:000223157100009

PM 15332448

ER

**PT J small sample special group**

AU Natale, V

    Martoni, M

    Cicogna, P

AF Natale, V

    Martoni, M

    Cicogna, P

TI Effects of circadian typology on sleep-wake behavior of air traffic  
    controllers

SO PSYCHIATRY AND CLINICAL NEUROSCIENCES

TC 9

Z9 10

SN 1323-1316

PD OCT

PY 2003

VL 57

IS 5

BP 539

EP 541

DI 10.1046/j.1440-1819.2003.01160.x

UT WOS:000185084400013

PM 12950710

ER

**PT J no CSM data**

AU Natale, V

Cicogna, P

AF Natale, V

Cicogna, P

TI Morningness-eveningness dimension: is it really a continuum?

SO PERSONALITY AND INDIVIDUAL DIFFERENCES

TC 112

Z9 113

SN 0191-8869

PD APR 5

PY 2002

VL 32

IS 5

BP 809

EP 816

DI 10.1016/S0191-8869(01)00085-X

UT WOS:000174990800004

ER



**PT J no CSM data**

AU Koscec, A

Radosevic-Vidacek, B

Kostovic, M

AF Koscec, A

Radosevic-Vidacek, B

Kostovic, M

TI Morningness-eveningness across two student generations: would two decades make a difference?

SO PERSONALITY AND INDIVIDUAL DIFFERENCES

CT Psychological Conference on XIV Ramiro Bujas Days

CY DEC, 1999

CL ZAGREB, CROATIA

TC 7

Z9 7

SN 0191-8869

PD SEP

PY 2001

VL 31

IS 4

BP 627

EP 638

UT WOS:000170080800015

ER

**PT J CSM mean and age not reported**

AU Natale, V

Alzani, A

AF Natale, V

Alzani, A

TI Additional validity evidence for the composite scale of morningness

SO PERSONALITY AND INDIVIDUAL DIFFERENCES

TC 35

Z9 37

SN 0191-8869

PD JAN 19

PY 2001

VL 30

IS 2

BP 293

EP 301

DI 10.1016/S0191-8869(00)00046-5

UT WOS:000165679500010

ER

**PT J no CSM data**

AU Guardia, J

Adan, A

AF Guardia, J

Adan, A

TI Confirmatory factor analysis applied to Matthews adjective checklist of  
self-reported activation: Effect of time of day

SO QUALITY & QUANTITY

TC 3

Z9 3

SN 0033-5177

PD FEB

PY 1997

VL 31

IS 1

BP 95

EP 106

DI 10.1023/A:1004242119822

UT WOS:A1997WN39300006

ER

Baek J.H., Kim J.S., Kim M.J., Ryu S., Lee K., Ha K., Hong K.S., "Lifetime Characteristics of Evening-Preference and Irregular Bed-Rise Time Are Associated With Lifetime Seasonal Variation of Mood and Behavior: Comparison Between Individuals With Bipolar Disorder and Healthy Controls", 2014, "Behavioral Sleep Medicine" ,,, ,,, ,,, 14,, 10.1080/15402002.2014.974179, "http://www.scopus.com/inward/record.url?eid=2-s2.0-84909942525&partnerID=40&md5=fd21fae9f16eb08434fb859cf1f8982d", "Department of Psychiatry, Sungkyunkwan University School of Medicine Samsung Medical Center --- **duplicate sample to Bae et al.**

Smith C.S., Reilly C., Midkiff K., "Evaluation of Three Circadian Rhythm Questionnaires With Suggestions for an Improved Measure of Morningness", 1989, "Journal of Applied Psychology", "74", "5", "728", "738", 376, "<http://www.scopus.com/inward/record.url?eid=2-s2.0-0024747515&partnerID=40&md5=b7365e9fe0192dcadc99b1d4e1463a87>", "Bowling Green State University, United States", "Smith, C.S., Bowling Green State University, United States --- **no age given**

Morales J.F.D., Sanchez-Lopez M.P., Thorne C., "The composite and the preferences scales of morningness in peruvian university students [La escala de preferencias y la escala compuesta de matutinidad en universitarios peruanos]", 2005, "Interamerican Journal of Psychology", "39", "2", "203", "210", "http://www.scopus.com/inward/record.url?eid=2-s2.0-77954972993&partnerID=40&md5=14e2ae4c83c029ee35952adb94cef873", "Departamento de Psicología Diferencial y Psicología del Trabajo, Facultad de Psicología, Campus de Somosaguas, s/n, 28223, Madrid, Spain --- **duplicate sample**

Ong J.C., Huang J.S., Kuo T.F., Manber R., "Characteristics of insomniacs with self-reported morning and evening chronotypes", 2007, "Journal of Clinical Sleep Medicine", "3", "3", "289", "294", "41", "<http://www.scopus.com/inward/record.url?eid=2-s2.0-34248596197&partnerID=40&md5=7a254f3b4ead8d8757a71b29593dbe32>", "Department of Psychiatry and Behavioral Sciences, Stanford University, Stanford, CA, United States **clinical**

Horzum MB, Randler C, Masal E, Beşoluk Ş, Önder İ, Vollmer C. Morningness-eveningness and the environment hypothesis - A cross-cultural comparison of Turkish and German adolescents. *Chronobiol Int.* 2015 Jul;32(6):814-821. Epub 2015 Jun 10. PubMed PMID: 26061589 **adolescents**



Bei B, Ong JC, Rajaratnam SM, Manber R. Chronotype and Improved Sleep Efficiency Independently Predict Depressive Symptom Reduction after Group Cognitive Behavioral Therapy for Insomnia. *J Clin Sleep Med*. 2015 Mar 16. pii: jc-00065-15. [Epub ahead of print] PubMed PMID: 25845891. **clinical**

Schaal S., Peter M., Randler C., "Morningness-eveningness and physical activity in adolescents", 2010, "International Journal of Sport and Exercise Psychology", "8", "2", "147", "159", "9", "http://www.scopus.com/inward/record.url?eid=2-s2.0-77957722328&partnerID=40&md5=5ef279c4afbd909bc0760b85c3388320", "University of Bamberg, Germany --- **adolescents**

Mansour H., Tobar S., Fathi W., Ibrahim I., Wood J., Elassy M., Elsayed H., Yassin A., Salah H., Eissa A., El-Boraie H., El-Boraie O., Dobe A., Osama H., Goma Z., El-Bahaei W., Monk T.H., Nimgaonkar V.L., "Arabic versions of the sleep timing questionnaire and the composite scale of morningness", 2015, "Asian Journal of Psychiatry", "13", "48", "51", "10.1016/j.ajp.2014.10.004", "<http://www.scopus.com/inward/record.url?eid=2-s2.0-84926316754&partnerID=40&md5=928f35e6fdab6b7a288e5e1c044d90b8>", "Department of Psychiatry, University of Pittsburgh School of Medicine, Western Psychiatric Institute and Clinic, Pittsburgh, PA, United States --- **no data available on CSM on submission date**

Chung J.K., Lee K.Y., Kim S.H., Kim E.-J., Jeong S.H., Jung H.Y., Choi J.-E., Ahn Y.M., Kim Y.S., Joo E.-J., "Circadian rhythm characteristics in mood disorders: Comparison among bipolar I disorder, bipolar II disorder and recurrent major depressive disorder", 2012, "Clinical Psychopharmacology and Neuroscience", "10", "2", "110", "116", "9", "<http://www.scopus.com/inward/record.url?eid=2-s2.0-84865806331&partnerID=40&md5=08d070cbc4560d75fc757e0d2b5792bd>", "Department of Neuropsychiatry, Eulji General Hospital, Eulji University School of Medicine, 14, Hangeulbiseong-ro, Nowon-gu, Seoul 139-711, South Korea-- **clinical**

Levandovski R., Sasso E., Hidalgo M.P., "Chronotype: A review of the advances, limits and applicability of the main instruments used in the literature to assess human phenotype [Cronotipo: Uma revisão dos avanços, limites e aplicabilidade dos principais instrumentos utilizados na literatura para avaliar o fenótipo humano]", 2013, "Trends in Psychiatry and Psychotherapy", "35", "1", "3", "11", "3,10.1590/S2237-60892013000100002", "<http://www.scopus.com/inward/record.url?eid=2-s2.0-84878447122&partnerID=40&md5=53356e0c0cca8380ee7652a6bee69499>", "Laboratório de Cronobiologia, Hospital de Clínicas de Porto Alegre HCPA), Universidade Federal do Rio Grande do Sul (UFRGS), Porto Alegre, RS, Brazil --- **review**

Perea C.S., Nino C.L., Lopez-Leon S., Gutierrez R., Ojeda D., Arboleda H., Camargo A., Adan A., Forero D.A., "Study of a functional polymorphism in the PER3 gene and diurnal preference in a Colombian sample", 2014, "Open Neurology Journal", "8", "1", "7", "10", 2, 10.2174/1874205X01408010007, "<http://www.scopus.com/inward/record.url?eid=2-s2.0-84900868168&partnerID=40&md5=a1da0f114320ae424fdb1eb8a0658cbe>", "Laboratory of NeuroPsychiatric Genetics, Biomedical Sciences Research Group, School of Medicine, Universidad Antonio Nariño. Bogotá, Colombia --- **overlap with Ojeda et al.**

Duarte J., Nelas P., Chaves C., Ferreira M., Coutinho E., Cunha M., "Sleep-wake patterns and their influence on school performance in Portuguese adolescents", 2014, "Atencion Primaria", "46", "S5", "160", "164", "10.1016/S0212-6567(14)70085-X", "<http://www.scopus.com/inward/record.url?eid=2-s2.0-84919658342&partnerID=40&md5=190ac2568f16b21e9ecce879a80e3a72>", "Escola Superior de Saúde de Viseu, Instituto Politécnico de Viseu, Viseu, Portugal", "Duarte, J., Escola Superior de Saúde de Viseu, Instituto Politécnico de Viseu, Viseu, Portugal --- **adolescents**
